# Supplementary material for: Factors influencing the attention to home storage of medicines in China
Source: BMC Public Health. 2019 Jun 27;19:833. doi: 10.1186/s12889-019-7167-5 (PMC6598263; doi:10.1186/s12889-019-7167-5)
Supplement: Supplementary file 2 — Study Data. All the data used in our study. (XLS 170 kb) [file 12889_2019_7167_MOESM2_ESM.xls]

## Sheet: Study Data
Q1	Q2	Q3	Q4	Q5	Q6	Q71	Q72	Q73	Q74	Q75	Q76	Q77	Q78	Q79	Q710	Q711	Q712	Q713	Q714	Q8	Q9	Q10	Q11	Q12	Q13	Q14	Q15	Q16	Q17	Q18	Q19	Q20
2	1	4	5	4	4	1	0	0	0	0	1	0	0	0	0	1	0	0	0	4	4	3	1	2	1	4	3	3	1	2	4	3
2	1	4	5	5	4	1	0	0	0	0	0	1	0	0	1	0	0	0	0	4	4	2	3	1	3	3	4	2	1	4	3	2
2	2	1	2	5	4	0	0	0	0	1	0	0	0	0	0	1	0	0	1	5	5	3	5	3	5	5	5	1	1	3	1	2
2	3	2	1	4	5	1	1	1	0	0	0	0	0	0	0	0	0	0	1	5	5	1	5	5	5	5	5	5	1	5	1	2
2	1	1	6	5	5	1	0	0	0	0	0	0	0	1	0	0	0	0	0	4	4	3	4	1	3	5	5	4	4	3	3	2
1	1	4	7	5	5	1	1	0	0	0	0	0	1	1	0	0	0	0	0	4	4	4	4	3	5	4	5	4	5	4	4	2
2	2	3	9	5	5	1	0	1	0	0	0	0	0	0	0	0	0	0	0	5	3	3	4	2	2	4	3	1	2	2	2	2
2	1	2	1	5	5	1	0	0	0	0	1	1	0	0	0	1	0	0	0	5	5	4	5	3	5	5	5	5	4	4	5	2
1	1	4	2	2	4	1	0	0	0	0	0	0	0	0	0	0	0	0	0	5	5	5	5	5	5	5	5	5	5	5	5	2
2	1	1	9	4	1	0	0	0	0	0	0	0	0	0	0	0	0	0	1	2	4	3	1	1	2	3	2	2	3	2	2	2
1	1	1	3	1	1	1	0	0	0	0	1	1	0	0	0	0	0	0	0	5	5	2	3	1	2	4	2	4	1	4	2	2
1	1	2	6	3	5	0	0	0	0	0	0	0	0	0	0	0	0	0	1	5	5	5	5	5	5	5	5	5	5	5	5	2
1	1	2	6	3	5	0	0	0	0	0	0	0	0	0	0	0	0	0	1	5	5	5	5	5	5	5	5	5	5	5	5	2
1	1	2	6	1	5	0	0	0	0	0	0	0	0	0	0	0	0	0	1	5	5	5	5	5	5	5	5	5	5	5	5	2
1	1	4	5	4	5	1	1	0	0	0	0	0	0	0	0	0	0	0	0	3	4	3	3	3	3	3	3	3	3	4	3	2
1	1	4	3	4	4	1	0	0	0	0	0	0	0	0	0	0	0	0	0	3	3	1	2	2	1	3	3	3	3	3	4	2
2	1	4	5	5	5	1	0	0	0	0	1	0	0	0	0	0	0	0	0	5	3	1	1	3	3	1	4	1	1	2	4	2
2	2	3	2	3	5	1	0	1	0	0	0	0	1	0	0	1	0	0	0	5	5	1	1	1	1	1	5	1	1	3	3	2
2	1	2	6	3	5	1	0	0	0	0	0	0	0	0	0	0	0	0	0	5	5	1	1	1	1	5	5	5	5	5	1	2
2	2	1	2	5	2	1	0	1	0	0	0	0	0	0	0	1	0	0	0	5	5	4	4	2	2	5	2	4	2	4	5	2
2	2	3	8	3	4	0	0	0	0	0	1	0	1	1	0	0	0	0	0	5	5	5	5	5	5	5	5	5	5	4	5	2
2	1	4	4	3	3	1	0	0	0	0	1	0	0	0	0	0	0	0	0	3	3	5	5	3	5	5	5	3	3	5	5	2
1	3	3	8	5	4	1	0	0	0	0	1	0	0	0	0	0	0	0	0	5	4	2	1	3	4	5	5	4	5	4	4	2
2	1	1	2	5	2	1	0	1	0	0	0	0	0	0	0	0	0	0	0	5	5	2	4	1	4	5	3	3	1	3	3	2
2	3	4	2	5	4	1	0	0	0	0	0	0	1	0	0	0	0	0	0	5	5	5	5	5	5	5	5	1	1	5	5	2
2	4	3	1	5	4	1	0	0	0	0	1	0	0	0	0	0	0	1	0	5	5	1	5	1	1	3	1	5	1	2	5	2
2	2	1	7	3	2	1	0	1	0	0	0	0	0	0	0	1	0	0	0	3	4	2	5	3	3	3	3	3	3	3	4	2
2	1	4	9	2	5	1	0	0	0	0	0	0	0	0	0	0	0	0	0	3	3	3	3	1	3	3	4	3	3	4	1	2
1	3	1	2	4	4	1	1	0	0	0	1	0	1	0	0	0	0	0	0	5	1	4	5	3	3	5	4	3	1	2	4	2
2	3	1	2	3	2	1	0	1	0	0	0	0	0	0	0	1	0	0	0	3	2	2	2	1	1	3	5	1	1	2	5	2
2	2	1	3	5	2	1	0	0	0	0	0	0	0	0	0	1	1	0	0	4	4	4	4	4	4	4	4	4	4	4	5	2
2	2	1	2	3	4	1	0	1	0	0	1	0	0	0	1	0	0	0	0	5	5	4	5	1	1	2	1	1	1	3	2	2
2	1	4	5	5	4	1	1	0	0	1	0	0	0	0	0	0	0	0	0	5	5	3	2	3	3	3	4	4	4	2	4	2
2	2	2	1	5	5	1	1	0	0	0	0	0	0	1	0	0	0	0	0	5	5	5	5	1	1	5	5	1	1	5	5	2
1	1	4	5	3	5	1	0	0	0	0	0	0	0	0	0	0	0	0	0	2	2	1	3	2	2	2	2	2	2	2	2	2
1	1	4	5	3	5	1	1	0	0	0	0	0	0	0	0	1	0	0	0	5	5	5	5	5	5	5	5	5	5	5	5	2
2	1	4	5	4	3	1	1	0	0	0	0	0	1	1	0	0	0	0	0	4	3	1	4	1	4	3	1	1	1	2	4	2
2	1	4	5	4	2	1	0	0	0	0	0	0	0	0	0	1	0	0	0	2	4	1	4	1	2	2	4	2	3	3	4	2
1	1	4	5	4	3	1	0	0	0	0	1	0	0	0	0	0	0	0	0	3	5	1	1	1	3	3	3	3	3	2	1	2
2	1	4	5	3	4	1	0	0	0	0	1	0	0	0	0	0	0	0	0	3	3	2	4	3	2	4	5	3	2	3	5	2
2	1	4	3	3	1	1	1	1	0	1	1	0	0	0	0	0	0	0	0	3	4	2	4	4	4	5	4	4	1	4	4	2
2	1	4	5	3	4	1	0	0	0	1	1	0	0	1	0	1	0	0	0	5	5	2	4	3	1	4	5	3	1	4	3	2
2	1	4	5	4	5	1	1	0	0	0	0	0	1	1	0	0	0	0	0	4	4	2	2	2	2	5	5	3	2	2	5	2
2	1	4	6	3	3	1	0	0	0	0	1	0	0	0	0	0	0	0	0	3	3	1	1	1	1	1	1	1	1	1	2	2
2	1	4	5	4	4	1	0	0	0	0	0	0	0	0	0	0	0	0	0	4	4	3	3	2	3	2	4	2	2	3	3	2
2	3	2	8	3	4	1	0	0	0	0	0	0	1	1	0	0	0	0	1	5	5	4	4	3	4	5	5	1	1	2	1	2
2	1	4	5	5	5	1	1	0	0	0	0	0	0	0	0	0	0	0	0	3	3	3	3	2	3	3	3	2	3	3	4	2
2	1	4	5	4	1	1	1	1	0	1	0	0	0	0	0	0	0	0	0	5	5	3	5	4	4	3	4	3	5	4	4	2
2	1	4	3	3	2	1	0	0	0	0	1	0	0	0	0	1	0	0	0	5	5	3	5	1	5	4	5	5	4	4	4	2
1	1	4	8	4	1	1	0	0	0	0	1	0	1	0	1	0	0	1	0	4	3	2	5	1	2	5	3	3	4	2	4	2
1	1	4	5	4	1	0	0	0	0	0	0	0	0	0	0	0	0	0	1	4	3	2	4	3	3	3	3	2	3	4	4	2
1	1	4	3	3	1	1	0	0	0	0	0	1	1	0	0	0	0	0	0	5	5	3	5	4	5	5	4	4	5	5	5	2
1	1	4	3	3	4	1	0	1	1	1	1	1	0	0	0	0	0	0	0	4	4	4	5	5	5	2	5	1	3	2	2	2
2	1	4	5	5	1	1	0	0	0	0	0	0	0	0	0	0	0	0	0	4	1	1	3	2	3	5	1	3	2	2	5	2
1	1	4	5	3	4	1	0	0	0	0	0	0	0	0	0	0	0	0	0	5	5	5	5	5	5	5	5	5	5	5	5	2
1	3	2	8	3	4	1	0	0	0	0	0	0	1	1	0	0	0	0	1	5	5	3	3	3	3	5	5	1	1	2	1	2
1	1	4	5	3	5	1	0	0	0	0	0	0	0	0	0	0	0	0	0	3	3	3	3	3	3	3	3	3	3	3	3	2
1	1	4	5	5	5	1	0	0	0	0	0	0	0	0	0	0	0	0	0	5	5	5	5	5	5	5	5	5	5	5	5	1
1	1	4	5	4	2	1	0	0	0	0	0	0	0	0	0	0	0	0	0	3	3	3	3	3	3	3	3	3	3	3	4	1
1	1	4	5	4	2	1	0	0	0	0	1	1	0	0	0	0	0	0	0	1	1	1	1	1	1	1	1	1	1	1	1	1
1	1	4	5	4	5	1	1	0	0	0	0	0	0	0	0	1	0	0	0	5	5	5	5	5	5	5	5	5	5	5	5	1
1	1	4	5	5	2	1	0	0	0	0	0	0	0	0	0	0	0	0	0	5	5	4	4	3	4	4	5	4	5	4	3	1
1	1	4	5	5	5	0	0	0	0	0	0	0	0	0	0	0	0	0	1	3	3	1	1	1	2	4	4	3	3	2	3	1
1	1	4	5	3	5	1	1	1	0	0	1	1	1	0	0	0	0	1	0	3	4	4	4	4	4	4	4	4	4	4	4	1
1	1	4	5	4	2	1	0	0	0	0	0	0	0	0	0	0	0	0	0	4	4	1	1	3	3	3	3	4	3	3	3	1
2	1	4	5	4	4	1	0	0	0	0	0	0	0	1	0	0	0	0	0	4	4	3	3	3	3	3	4	3	3	2	4	1
1	1	4	5	4	4	1	0	0	0	0	0	0	0	0	0	0	0	0	0	4	4	3	4	4	4	4	4	4	4	4	1	1
2	1	4	5	5	5	1	0	0	0	0	0	0	0	0	0	0	0	0	0	3	2	3	2	2	1	5	4	3	2	3	4	1
2	1	4	5	3	3	1	0	1	0	0	1	0	0	0	0	1	0	0	0	2	2	3	1	1	1	1	1	1	1	2	5	1
2	1	4	5	2	4	1	0	0	0	0	0	0	0	0	0	0	0	0	1	3	2	3	4	3	2	4	5	5	2	3	5	1
1	1	4	5	4	3	1	0	0	0	0	0	1	0	0	0	0	0	0	1	5	5	3	4	2	5	5	1	5	5	5	5	1
2	1	4	7	5	5	1	0	1	0	0	0	0	0	0	0	0	0	0	0	5	5	4	4	3	2	5	5	4	5	4	2	1
1	1	1	5	3	1	1	0	0	0	0	0	0	0	0	0	0	0	0	0	5	5	3	3	3	3	1	1	1	1	5	5	1
2	1	4	5	5	4	0	1	0	0	0	0	0	0	0	0	1	0	0	0	3	3	3	2	1	1	2	5	3	2	4	1	1
1	1	4	5	3	3	1	1	0	0	0	1	0	0	0	0	0	1	0	0	4	4	2	4	2	4	2	4	5	1	4	5	1
2	2	1	2	3	4	1	0	0	0	1	0	0	0	1	0	0	0	0	0	4	5	4	5	3	5	5	5	3	3	3	5	1
2	1	1	5	4	3	1	0	0	0	0	1	0	0	0	0	0	0	0	0	4	4	2	3	3	3	4	4	4	3	4	5	1
1	1	4	5	3	3	1	0	0	0	0	1	0	0	0	0	0	0	0	0	5	5	3	4	3	4	3	3	3	2	3	4	1
1	1	4	5	3	3	0	0	1	0	0	0	0	0	1	0	1	0	0	0	5	5	4	5	4	5	4	4	5	4	5	4	1
2	1	4	5	4	4	1	0	0	0	0	0	1	0	0	0	0	0	0	0	3	4	3	3	3	3	3	3	3	2	2	4	1
1	1	4	5	5	5	0	0	0	0	0	0	0	0	0	0	0	0	0	1	5	5	3	3	3	3	3	3	3	3	3	5	1
1	1	4	5	5	5	1	1	0	0	0	1	1	0	0	0	0	0	0	0	4	4	1	3	1	3	5	5	5	5	5	5	1
2	3	4	2	3	4	1	0	1	0	0	0	0	0	0	0	0	0	0	0	5	5	4	5	2	4	5	5	1	2	3	2	1
2	1	4	5	4	5	0	0	0	0	0	0	0	0	0	0	0	0	0	1	4	4	1	1	3	5	5	5	2	5	2	5	1
1	1	4	4	3	5	1	0	1	0	0	1	0	0	0	0	1	0	0	0	3	3	3	2	3	3	4	5	2	1	3	3	1
1	1	4	5	4	4	1	0	0	0	0	0	0	0	1	0	0	0	0	0	4	5	3	1	1	1	5	5	3	4	2	3	1
1	1	1	5	5	4	1	0	0	0	0	0	0	1	0	0	0	0	0	0	2	2	2	2	2	2	2	4	2	4	3	5	1
1	1	4	3	4	3	1	0	0	0	0	0	0	0	0	0	0	0	0	0	3	3	3	5	3	5	5	5	5	5	5	5	1
1	1	4	5	4	5	1	0	0	0	0	0	0	0	0	0	0	0	0	0	5	5	1	1	3	3	3	3	3	1	3	3	1
1	1	4	5	3	4	1	0	0	0	0	0	0	0	0	0	0	0	0	0	5	5	4	2	3	3	3	4	4	4	3	4	1
1	1	4	5	5	2	1	0	1	0	0	0	0	0	1	0	0	0	0	0	5	5	1	3	3	5	5	5	5	5	5	5	2
2	1	4	5	4	4	1	1	0	0	0	0	0	1	0	0	0	0	0	1	5	5	3	4	3	4	3	5	1	5	5	5	2
2	1	4	5	5	2	1	1	0	0	0	0	1	0	0	1	0	0	0	0	3	3	3	3	2	4	3	5	5	2	2	4	2
1	1	4	3	5	2	1	0	0	0	0	0	0	0	0	0	0	0	0	1	1	5	3	3	3	3	3	3	3	3	3	3	2
2	1	4	3	5	6	1	1	0	0	0	1	1	1	0	0	0	0	0	0	4	4	2	4	2	3	4	4	1	1	4	1	2
1	1	4	3	4	1	1	0	0	0	0	1	0	0	0	0	0	0	0	0	3	4	3	3	3	3	3	4	3	3	3	4	2
2	4	2	1	5	4	1	0	0	0	0	0	0	0	0	1	1	0	0	1	2	2	2	2	2	3	4	2	2	2	3	2	2
1	4	4	2	5	4	1	1	1	0	0	0	0	1	0	0	0	0	0	0	4	4	4	4	2	3	5	4	4	4	4	3	2
1	5	4	2	2	4	1	0	1	1	0	0	1	0	0	0	0	1	1	0	5	5	3	3	3	4	5	4	4	3	4	2	2
2	1	4	3	3	6	1	0	0	0	1	1	1	0	0	0	0	0	0	0	4	5	1	4	1	1	5	3	3	2	3	2	2
2	1	4	5	4	3	1	0	0	0	0	0	0	0	0	0	0	0	0	0	4	4	3	1	3	3	4	5	2	2	2	5	2
2	1	4	5	5	2	1	0	0	0	0	0	0	1	0	0	0	0	0	0	5	5	3	3	2	2	2	5	3	3	2	3	2
2	2	4	3	5	2	1	1	1	0	1	1	0	1	1	1	1	0	0	0	4	5	1	5	1	4	5	5	5	5	3	3	2
1	2	1	7	4	2	1	1	1	0	1	0	0	1	0	0	1	0	0	0	4	4	3	4	1	2	3	5	5	2	3	1	2
1	2	1	7	4	4	1	1	1	0	1	0	0	1	0	0	1	0	0	0	4	4	3	4	1	2	3	5	5	2	3	1	2
2	2	4	7	4	6	1	0	0	0	0	1	0	0	1	0	1	0	0	0	4	3	2	2	3	3	4	4	3	2	3	4	2
2	2	4	1	5	4	1	0	0	0	0	0	0	0	0	0	0	0	0	0	5	5	1	1	3	3	5	3	1	5	3	1	2
2	2	4	9	5	4	1	0	0	0	1	1	1	0	0	0	0	0	0	0	5	5	2	1	3	3	5	5	5	5	3	5	2
2	2	3	1	5	3	1	0	1	0	0	0	0	0	0	0	1	0	0	0	4	4	3	4	1	3	3	5	3	1	3	5	2
2	3	4	7	3	3	1	1	0	0	0	0	0	0	0	1	0	0	0	0	5	5	4	4	2	3	3	3	3	3	4	4	2
2	1	4	5	3	3	0	0	0	0	0	0	0	0	0	0	0	0	0	1	4	4	1	1	1	1	1	1	1	1	1	3	3
1	1	4	5	5	4	1	0	0	0	0	0	0	0	0	0	0	0	0	1	5	5	3	3	3	4	5	5	4	5	3	1	3
2	1	4	5	4	4	1	0	0	0	0	0	0	1	0	0	0	0	0	0	4	4	2	2	3	3	3	1	2	2	3	2	3
2	1	4	1	5	3	1	0	0	0	0	0	0	1	0	0	0	0	0	0	1	1	1	5	1	1	5	5	5	5	1	1	3
1	1	4	5	4	6	1	0	0	0	0	1	0	0	0	0	1	0	0	0	3	3	1	3	2	3	2	4	4	1	2	3	1
2	1	4	7	3	4	0	0	0	0	0	0	0	0	0	0	0	0	0	1	5	5	5	5	5	5	5	5	5	3	3	5	1
2	2	4	3	2	4	1	0	0	0	0	0	0	0	0	0	1	0	0	0	1	3	2	3	1	3	2	5	4	2	2	5	1
1	2	2	3	4	5	1	1	0	0	0	0	0	0	0	0	0	0	0	0	5	3	3	3	5	1	5	5	4	1	2	5	1
2	1	1	4	2	6	1	0	0	0	1	0	0	0	0	0	0	0	0	0	4	4	2	2	1	4	4	4	4	2	3	4	1
2	3	3	6	4	4	1	0	1	0	0	0	0	0	0	0	1	1	0	0	4	3	1	3	1	3	5	4	3	4	3	3	1
1	3	5	8	4	1	1	1	0	0	0	1	0	0	0	0	0	0	0	0	5	5	5	5	5	5	5	5	5	5	3	3	1
2	3	3	6	4	4	1	0	0	0	0	1	0	0	1	1	1	0	1	0	2	4	2	5	4	2	4	5	5	1	3	1	1
2	1	4	7	4	5	1	1	1	0	1	0	0	0	0	0	0	0	0	0	5	5	5	5	5	5	5	5	5	5	5	2	1
2	2	4	3	2	2	1	0	0	0	0	1	0	0	0	0	0	0	0	0	2	2	3	4	2	3	3	3	2	3	3	5	1
2	1	4	5	4	3	1	1	1	0	0	1	0	1	1	1	1	0	0	0	3	4	2	2	1	2	4	4	2	2	3	5	1
2	1	4	9	4	4	1	0	0	0	0	0	0	0	0	0	0	0	0	0	5	5	3	4	2	4	5	5	5	3	3	2	1
1	3	3	3	3	4	1	0	0	0	0	1	1	0	0	0	0	0	0	0	5	5	5	5	5	5	5	5	5	5	5	5	1
2	1	4	8	3	3	1	0	0	0	0	0	0	0	0	0	1	0	0	0	3	3	1	3	1	1	5	5	5	3	4	5	1
2	3	1	7	3	4	1	0	0	0	0	0	1	0	0	0	1	0	0	0	3	5	3	3	3	3	3	5	3	3	3	3	1
2	1	1	7	5	4	1	0	0	0	1	0	1	0	0	0	0	0	0	0	2	2	1	4	1	2	2	5	2	1	2	2	1
2	3	2	1	5	3	1	1	1	0	1	1	1	0	0	0	1	1	1	0	5	5	4	4	3	4	4	3	3	3	3	3	1
1	1	3	9	4	5	0	0	0	0	0	0	0	0	0	0	0	0	0	1	3	3	2	2	2	2	2	2	2	2	2	2	1
2	4	3	9	5	2	0	0	0	0	0	0	0	1	1	0	0	1	1	0	5	5	5	1	5	5	5	5	5	5	5	1	1
1	2	5	8	5	4	1	0	0	0	0	0	0	0	0	0	0	0	0	0	3	5	1	2	1	1	5	5	2	1	3	5	1
2	1	1	3	5	5	1	0	0	0	0	0	0	0	0	0	0	1	0	0	2	2	2	1	1	1	5	5	3	1	3	3	1
2	1	4	5	4	4	1	0	0	0	0	1	0	0	0	0	0	0	0	0	4	4	4	4	4	4	4	4	4	4	4	4	1
2	1	4	5	3	4	1	0	0	0	0	1	1	0	1	0	0	1	0	0	5	4	2	3	2	3	4	2	2	2	5	4	1
2	1	1	3	5	1	1	0	0	0	0	0	0	0	0	0	0	0	0	0	5	5	1	1	1	1	5	1	1	1	1	5	1
1	3	2	6	4	5	1	0	0	0	0	0	0	0	0	0	0	0	0	0	5	5	2	2	2	4	4	5	2	5	3	5	1
1	4	5	6	4	5	1	1	1	0	1	1	1	1	1	0	1	1	1	0	5	5	4	3	4	4	4	4	4	4	4	4	1
1	1	4	3	4	2	1	0	0	0	0	0	0	1	1	0	0	0	0	0	1	5	2	4	1	2	5	5	5	1	2	3	1
1	2	4	3	5	5	1	0	0	0	0	1	1	0	0	0	0	0	0	0	5	5	4	5	4	4	5	5	5	5	4	5	1
2	2	2	8	5	3	0	0	0	0	0	0	0	0	0	0	0	0	0	1	5	5	1	5	5	5	5	5	1	5	5	1	1
2	4	3	8	4	5	1	1	1	1	0	0	0	0	0	0	0	0	0	0	5	5	1	5	5	5	5	5	5	1	5	1	1
1	1	4	8	5	5	1	0	0	0	0	0	0	0	0	0	0	0	0	0	5	5	1	5	3	3	5	5	5	5	3	3	1
1	1	4	3	5	5	1	0	0	0	0	0	0	0	0	0	0	0	0	0	2	4	1	5	3	5	5	5	5	3	3	5	1
2	1	4	5	4	4	1	0	1	0	0	0	1	0	0	0	0	0	0	0	3	3	1	1	1	1	1	1	1	1	1	1	1
2	2	1	7	5	4	1	0	1	0	1	1	0	1	0	0	0	1	0	0	4	4	1	4	1	1	2	2	2	1	3	5	1
2	2	2	2	3	5	1	1	1	0	0	0	0	0	0	0	0	0	0	0	5	5	1	5	5	5	5	5	5	5	5	1	1
2	1	4	9	1	2	0	0	0	0	0	0	0	0	1	0	1	0	0	0	5	5	4	4	2	4	4	4	4	4	4	5	1
1	1	4	5	4	4	1	0	0	0	0	0	0	0	0	1	1	0	0	0	4	4	2	2	2	2	4	2	2	2	2	2	1
2	1	4	3	3	6	0	0	0	0	0	1	0	0	0	0	0	0	0	0	3	3	1	1	1	1	5	5	3	1	4	4	1
2	3	3	6	4	2	1	0	0	0	0	0	0	1	0	0	0	1	0	0	3	3	4	4	3	2	4	5	2	4	4	3	1
2	3	3	9	3	4	1	1	0	0	0	0	0	0	0	0	0	0	0	1	5	1	1	1	1	1	1	5	1	5	1	5	1
2	3	3	9	3	4	1	0	0	0	0	0	0	0	0	0	0	0	0	0	5	5	1	3	1	3	5	2	4	1	3	5	1
1	3	3	8	5	4	1	0	0	0	0	0	0	0	0	0	0	1	0	0	1	1	1	2	1	2	2	5	1	1	2	3	1
2	2	4	1	5	5	1	1	1	0	0	0	0	0	0	0	0	0	0	0	5	5	3	3	2	2	5	5	5	3	3	3	1
2	2	3	7	5	3	1	0	0	0	1	1	0	0	0	0	0	0	0	0	5	4	2	4	2	2	2	4	3	3	2	3	1
2	1	4	9	1	4	1	0	1	1	1	0	1	0	0	0	0	0	0	0	1	1	3	1	1	3	4	5	1	1	3	3	1
2	1	1	7	2	6	1	0	1	0	0	1	0	0	0	0	0	0	0	0	5	5	5	5	3	3	5	5	4	4	3	3	1
1	1	4	3	5	4	1	0	0	0	0	1	1	0	0	0	0	0	0	0	5	5	3	5	2	5	5	5	2	2	2	5	1
2	1	3	6	3	5	1	1	1	0	0	0	0	0	0	0	0	0	0	0	5	5	3	5	1	3	3	1	1	1	2	1	1
1	1	4	5	4	4	1	0	0	0	0	0	0	0	0	0	0	0	0	0	5	5	1	3	3	3	1	3	3	3	3	3	1
1	1	4	5	5	5	1	1	0	0	1	1	1	1	1	0	1	0	0	0	5	5	3	5	5	5	5	5	5	5	5	5	1
1	1	4	5	3	5	0	0	0	0	0	0	0	0	0	0	0	0	0	1	4	3	2	4	1	3	5	5	4	3	3	3	1
2	1	2	5	4	5	1	0	0	0	0	0	0	0	0	0	0	0	0	0	5	5	1	1	5	1	1	5	1	5	5	1	1
1	1	4	5	4	5	1	1	0	0	0	0	0	0	0	0	0	0	0	0	3	3	4	4	4	4	3	4	3	3	3	3	1
1	1	4	5	3	6	1	0	0	0	0	0	0	0	0	0	0	0	0	0	4	5	3	4	3	3	5	5	4	4	3	4	1
1	1	4	9	3	6	0	0	0	0	0	0	0	0	0	0	0	0	1	0	5	5	5	5	5	5	5	5	5	5	5	5	1
2	3	3	1	4	1	1	0	1	0	0	1	0	1	0	0	0	0	0	0	5	5	4	1	1	4	4	5	4	3	4	1	2
2	1	4	5	4	6	1	1	0	0	1	1	0	0	0	1	1	0	0	0	4	4	2	2	1	1	1	1	5	1	4	1	2
1	1	4	3	4	4	1	0	0	0	0	1	0	0	1	0	0	0	0	1	5	5	4	4	4	4	5	5	5	4	5	4	2
2	1	4	5	4	5	1	0	0	0	0	0	0	0	0	0	0	0	0	0	3	3	3	3	3	4	4	4	4	4	3	3	2
1	1	4	5	5	5	1	0	0	0	0	1	0	1	1	0	0	0	0	0	5	5	3	3	4	3	3	4	4	3	4	3	2
2	1	4	5	2	1	1	1	0	0	0	1	1	0	0	0	1	0	0	0	3	2	2	3	1	1	1	3	1	1	2	2	2
2	1	4	6	3	5	1	1	0	1	0	0	0	1	1	1	0	0	0	0	4	4	1	3	4	3	4	1	4	1	2	3	2
1	1	4	5	5	5	0	0	0	0	0	0	0	0	0	0	0	0	0	1	3	3	2	1	1	5	5	5	3	5	3	5	2
2	2	3	3	4	4	0	1	0	1	0	1	0	0	0	1	0	1	1	0	5	5	5	5	4	4	4	4	4	3	3	2	2
2	4	2	2	5	4	1	0	0	1	0	0	0	0	0	0	1	0	0	0	4	4	3	3	2	2	5	2	3	5	2	5	2
2	4	4	4	5	4	1	0	0	1	0	0	0	0	0	0	0	0	0	0	5	5	5	5	5	5	5	5	5	1	5	1	2
2	1	4	5	4	6	1	0	0	0	0	0	0	0	0	0	0	0	0	0	5	5	1	3	1	1	3	5	1	1	2	5	2
1	1	4	5	4	4	1	0	0	0	0	0	0	0	0	0	0	0	0	0	5	5	5	5	5	5	5	5	5	5	5	5	2
2	1	4	5	4	5	1	1	0	0	0	1	1	0	0	1	1	1	1	0	5	5	3	2	1	1	5	4	2	1	4	5	2
1	1	4	5	3	6	1	0	0	0	0	1	0	0	0	0	0	0	0	0	3	3	2	3	2	2	3	4	4	4	4	5	2
1	1	5	9	1	2	1	0	1	0	1	1	0	0	0	0	0	0	0	0	4	3	3	3	3	3	3	3	5	3	3	3	2
2	1	4	5	4	4	1	0	1	0	0	0	0	1	0	0	1	0	0	0	4	4	3	5	4	3	5	5	4	5	5	5	2
1	1	4	5	3	2	1	1	0	0	1	1	0	0	0	0	0	0	0	0	5	5	3	3	4	4	4	4	3	4	4	4	2
2	1	4	5	3	4	1	1	0	0	1	1	1	0	0	0	1	0	0	0	5	5	1	3	3	3	1	5	3	5	3	1	2
2	1	4	5	4	4	1	1	0	0	0	0	0	0	0	0	0	0	0	0	5	5	4	4	3	3	4	5	4	4	4	4	2
2	1	4	5	4	4	1	0	0	0	0	0	0	1	1	0	0	0	0	0	4	4	3	3	3	5	4	4	4	4	2	2	2
2	1	4	5	4	2	0	0	0	0	0	0	0	0	0	0	0	0	0	1	3	1	1	4	1	1	3	4	1	4	3	3	2
2	1	4	9	1	4	1	0	0	0	0	0	0	0	0	0	0	0	0	0	4	3	3	3	1	1	3	3	3	3	3	4	2
1	1	4	5	5	3	1	0	0	0	0	1	1	1	0	0	0	0	0	0	4	4	4	3	3	4	4	4	4	3	4	3	2
2	1	4	5	4	3	1	0	0	0	0	0	0	0	0	0	0	0	0	0	5	5	3	2	1	3	1	5	5	3	4	3	2
1	1	4	5	3	3	1	0	0	0	0	0	0	0	0	0	0	0	0	0	3	3	3	3	3	3	3	3	3	3	3	3	3
2	1	4	9	4	5	1	0	0	0	0	1	0	0	0	0	0	0	0	0	5	5	5	5	3	5	5	5	5	2	4	5	3
2	2	1	7	5	4	1	0	1	0	1	1	0	0	0	0	1	1	0	1	4	5	3	4	2	3	4	5	3	3	4	3	3
1	1	4	5	5	4	1	0	0	0	0	0	0	0	0	0	0	0	0	0	4	4	3	5	2	3	3	3	3	1	2	3	3
1	1	4	5	3	4	1	0	0	0	0	0	0	0	0	0	0	0	0	0	1	1	1	1	1	1	1	1	1	1	1	1	3
1	1	4	5	4	6	1	0	0	0	0	0	0	0	0	0	0	0	0	1	3	3	3	3	4	3	4	4	4	4	4	3	3
1	1	4	5	3	5	1	0	0	0	0	0	0	0	0	0	0	0	0	0	5	5	4	5	3	4	4	4	3	3	4	4	1
1	1	3	9	3	3	0	1	0	1	0	0	0	0	0	0	0	0	0	0	2	2	2	2	2	2	2	2	2	2	2	2	1
2	1	2	6	3	2	1	1	0	0	0	0	0	0	0	0	0	0	0	0	2	2	1	1	1	1	1	3	1	1	2	3	1
2	2	4	9	3	4	1	0	1	0	0	0	0	0	0	0	1	0	0	0	5	5	2	5	3	4	3	4	4	3	5	4	1
2	4	5	1	5	5	1	1	1	1	0	0	0	0	0	0	0	1	1	0	5	5	1	5	5	5	5	5	5	5	5	1	1
1	4	4	2	4	2	1	0	0	1	0	1	0	1	0	0	0	0	0	0	3	3	2	2	1	1	2	4	2	2	2	1	1
2	1	4	5	4	1	1	1	0	0	0	1	1	0	0	0	1	0	0	1	4	4	1	3	1	3	5	5	2	2	2	4	1
1	1	4	5	3	5	1	1	0	0	0	1	0	0	0	0	0	0	0	0	3	3	2	3	3	3	3	3	3	3	3	3	1
1	3	1	2	3	3	1	1	1	0	0	1	0	1	0	1	0	0	0	0	4	4	3	4	4	3	4	4	4	4	4	3	1
1	1	4	9	3	5	1	0	0	0	0	1	0	0	0	0	0	0	0	0	4	4	3	1	1	3	5	5	2	1	2	4	1
1	5	1	9	5	1	1	1	1	1	1	1	1	1	1	1	1	1	1	1	1	1	1	1	1	1	1	1	1	1	1	1	1
2	1	1	8	5	1	1	0	0	0	0	0	0	0	0	0	0	0	0	0	1	1	2	1	1	1	2	2	3	2	2	2	1
2	1	4	5	3	1	1	0	1	0	0	0	0	0	0	0	1	0	0	0	3	2	1	1	2	4	2	2	2	2	4	4	1
1	1	4	4	5	1	1	1	1	0	1	0	1	1	1	0	1	0	0	1	4	4	2	1	3	3	3	4	3	3	2	4	1
1	1	3	6	5	5	1	0	0	0	0	0	0	0	0	0	1	0	0	0	2	2	2	2	1	2	3	4	2	2	2	3	1
1	1	4	5	5	4	1	0	0	0	0	0	0	0	0	0	0	0	0	1	5	5	1	1	4	4	1	5	3	3	3	3	1
2	1	1	5	3	4	1	1	0	0	0	0	1	0	0	0	0	0	0	1	5	5	3	4	3	3	5	5	3	3	4	1	1
2	1	4	5	4	4	1	0	0	0	0	0	0	0	0	0	0	0	0	0	4	4	1	2	1	1	2	5	1	1	2	4	1
1	1	4	3	4	4	1	0	1	0	0	0	0	0	1	0	0	0	0	0	5	5	1	4	2	2	4	5	1	1	3	5	1
2	1	1	5	4	4	1	0	0	0	0	0	0	0	0	0	0	0	0	0	5	5	2	3	5	4	3	3	3	3	3	2	1
1	1	4	5	4	4	1	0	0	0	0	0	1	0	1	0	1	0	0	0	4	2	1	2	2	3	4	2	3	2	4	5	1
1	2	1	7	5	4	1	0	1	0	0	0	0	0	0	0	0	0	0	0	5	5	4	4	4	4	5	4	5	4	4	5	1
2	2	1	7	3	2	0	0	0	0	1	0	0	0	0	0	0	0	0	0	5	2	3	5	1	4	5	5	1	4	5	5	1
2	1	1	3	3	2	1	0	0	0	0	0	0	0	0	0	0	0	0	0	5	5	2	1	1	1	5	1	1	1	3	3	1
2	1	4	5	5	2	1	0	0	0	0	0	1	0	0	0	0	0	0	0	3	4	1	5	3	3	3	5	5	5	2	5	1
2	1	4	5	3	4	1	0	0	0	0	1	0	0	0	0	0	0	0	1	4	5	2	3	1	2	2	4	1	1	2	3	1
2	2	3	3	4	3	0	0	0	0	0	0	0	0	0	0	0	0	0	1	1	1	2	2	2	2	3	3	2	2	2	5	1
2	2	3	8	3	4	0	0	0	0	0	0	0	0	0	0	0	0	0	1	3	2	2	2	2	2	3	3	4	4	2	3	1
2	1	1	5	3	4	0	0	0	0	0	0	0	0	0	0	1	0	0	0	5	5	3	3	1	1	1	3	3	3	3	3	1
2	2	2	6	4	5	1	0	0	0	0	0	0	0	0	0	0	0	0	0	1	5	5	5	1	5	5	5	5	5	5	5	1
2	2	2	9	5	3	1	0	0	0	0	0	0	1	0	1	0	1	0	0	3	3	1	1	1	2	3	3	1	1	3	1	1
2	2	2	1	5	3	1	0	0	0	0	0	0	0	1	1	0	1	0	0	3	3	2	3	3	3	3	3	1	1	2	3	1
2	1	4	3	5	3	1	0	0	0	0	1	0	1	1	0	1	0	0	0	2	2	2	3	2	2	4	4	2	1	4	2	1
2	2	2	6	4	5	1	0	0	0	0	0	0	0	0	0	0	0	0	0	5	5	1	5	5	5	5	4	5	1	5	5	1
2	2	4	1	5	5	1	1	1	1	1	1	1	1	1	0	1	1	0	0	5	5	4	5	4	5	5	5	5	1	4	4	1
2	2	2	3	4	5	1	0	0	0	0	0	0	0	0	0	0	0	0	0	5	5	2	4	1	2	5	3	1	1	4	1	1
2	3	5	3	4	5	0	0	0	0	0	0	0	0	0	0	0	0	0	1	5	5	5	5	5	5	5	5	5	5	5	1	1
2	3	3	9	3	4	1	0	1	0	0	0	0	0	0	0	0	0	0	0	3	3	1	3	1	1	5	5	1	3	2	5	1
2	2	2	6	4	5	1	1	0	0	0	1	0	0	0	1	0	0	0	0	4	4	4	5	4	4	4	3	3	3	4	3	1
1	1	4	5	4	5	1	0	0	0	0	0	0	0	0	0	0	0	0	0	5	5	3	5	3	3	5	5	3	3	3	3	1
2	1	4	5	5	5	1	1	0	0	0	1	1	0	1	0	0	0	0	0	5	5	2	2	3	4	5	5	5	5	4	3	1
1	1	4	5	3	6	1	0	1	0	0	0	0	0	0	0	0	0	0	0	2	2	2	1	2	2	2	4	2	3	2	4	1
1	1	4	5	5	6	1	0	0	0	0	1	1	0	0	0	0	0	0	0	4	4	2	3	2	4	2	4	2	3	3	3	1
1	1	4	5	5	6	1	0	0	0	0	1	0	1	0	0	0	0	0	0	4	4	2	2	2	3	3	4	3	4	4	3	1
2	1	4	5	5	6	1	0	0	0	0	0	1	0	0	0	1	0	0	0	3	3	1	2	2	2	3	1	1	2	3	1	1
2	1	4	5	5	6	1	0	0	0	0	1	0	0	0	0	0	0	0	0	4	4	1	1	1	1	3	3	3	2	3	3	1
2	1	4	5	4	6	1	1	0	0	0	0	1	1	0	0	0	0	0	0	2	3	2	2	3	2	3	2	3	3	3	3	1
1	1	4	5	4	6	0	1	0	0	0	0	0	0	0	0	0	0	0	0	3	3	3	1	3	3	3	5	3	3	4	5	1
2	1	4	5	4	6	1	0	0	0	0	0	0	0	0	0	0	0	0	0	3	2	1	1	2	3	4	4	5	2	3	2	1
2	1	4	5	3	6	1	0	0	0	0	1	0	1	0	0	1	1	0	0	2	4	1	1	1	3	4	4	3	1	3	5	1
1	1	4	5	3	6	1	0	0	0	0	0	0	0	0	0	0	0	0	0	3	4	1	1	2	4	4	5	4	1	3	4	1
2	2	3	8	3	4	0	0	0	0	0	0	0	0	0	0	0	0	0	1	5	5	4	4	5	4	5	4	4	4	2	4	1
2	1	4	5	5	4	1	1	0	0	0	0	0	0	0	0	0	0	0	0	5	5	2	5	3	3	4	4	4	4	4	4	1
2	1	4	5	3	6	1	0	1	0	0	0	1	0	0	0	0	0	0	0	5	5	1	1	2	2	2	5	1	5	5	4	1
2	1	4	5	4	6	1	0	0	0	0	0	0	0	0	0	0	0	0	0	4	4	2	3	1	3	3	5	1	2	3	4	1
1	1	4	5	4	6	1	0	0	0	0	0	1	0	0	0	0	0	0	0	3	3	2	2	2	3	4	5	3	3	4	3	1
2	1	4	5	4	6	1	0	0	0	0	0	0	0	0	0	0	0	0	1	5	5	3	3	3	2	5	5	3	3	2	1	1
2	1	1	2	5	6	1	0	0	0	1	0	1	0	1	0	0	0	0	0	3	3	1	1	1	2	4	5	3	2	4	4	1
2	1	4	5	5	4	1	0	0	0	0	0	1	1	1	0	0	0	0	0	2	2	3	4	3	3	3	4	4	3	3	3	1
2	1	4	5	3	4	1	0	0	0	0	1	0	0	0	0	0	0	0	1	5	5	2	4	2	5	5	5	5	2	4	4	1
1	1	4	9	4	4	1	1	0	0	0	0	0	0	1	0	0	0	0	0	1	1	1	2	1	1	1	1	1	1	2	1	2
2	1	4	5	4	4	1	0	0	0	0	0	0	0	0	0	0	0	0	0	4	4	2	4	1	2	2	4	3	4	2	3	2
1	1	1	5	3	4	1	0	1	0	0	0	0	0	0	0	0	0	0	0	2	2	1	1	1	1	5	5	1	1	4	3	2
2	1	4	5	5	4	1	0	0	0	0	1	0	0	0	0	0	1	0	0	5	4	2	1	1	2	3	3	3	1	3	4	2
1	1	4	5	4	4	1	0	0	0	0	0	1	0	0	0	0	0	0	0	3	3	2	1	3	2	1	3	2	2	3	2	2
1	1	4	5	3	4	1	0	0	0	0	1	0	0	0	0	0	0	0	1	5	5	1	4	2	1	5	5	4	4	3	3	2
2	1	4	5	5	4	1	0	0	0	0	0	0	0	0	0	0	0	0	0	4	4	2	1	1	1	1	2	2	2	2	1	2
2	1	4	5	4	4	1	1	0	0	0	1	1	0	1	0	0	0	0	1	4	4	1	2	1	4	5	5	4	3	3	3	2
1	1	1	5	5	4	1	0	0	0	0	0	0	0	0	0	0	0	0	0	5	5	2	4	4	4	5	5	3	4	4	3	2
2	1	4	5	3	4	1	0	0	0	0	0	0	0	0	0	0	0	0	0	4	4	1	4	1	2	1	5	2	1	2	1	2
1	1	4	5	3	4	1	0	0	0	0	0	0	0	1	0	0	0	0	0	3	3	4	4	3	3	5	5	4	3	3	3	2
2	1	4	5	3	4	1	0	0	0	0	0	1	0	0	0	0	0	0	0	5	5	3	3	3	3	1	2	1	1	2	1	2
2	1	4	5	4	4	1	0	0	0	0	0	0	0	0	0	0	0	0	0	5	5	4	3	1	3	4	4	4	4	4	3	2
1	1	4	5	4	6	1	0	0	0	0	0	0	0	1	0	0	0	0	0	3	3	2	5	1	2	3	3	1	3	4	3	2
2	1	4	5	4	6	1	0	0	0	0	0	1	0	0	0	1	0	0	0	5	5	4	2	3	4	3	5	3	1	4	4	2
2	1	4	5	5	4	1	0	0	0	0	0	0	0	0	0	0	0	0	0	5	5	1	1	1	1	1	2	5	1	2	2	2
2	1	4	5	3	4	1	1	1	0	0	1	0	1	0	0	0	0	0	0	4	3	2	1	1	1	4	5	1	2	2	5	2
2	1	4	5	3	4	1	0	1	0	1	1	0	1	1	0	1	0	0	0	2	3	3	4	1	4	4	4	4	2	2	4	2
2	1	4	5	5	4	1	0	0	0	0	0	0	1	0	0	0	0	0	0	4	4	1	3	1	2	4	4	3	1	2	3	2
2	1	4	5	4	4	1	0	0	0	0	0	0	0	0	0	0	0	0	0	4	4	2	1	1	3	4	5	1	2	3	5	2
1	1	4	5	5	4	1	0	0	0	0	0	0	0	1	0	0	0	0	0	5	5	1	1	1	4	3	4	3	3	3	4	2
2	1	4	5	5	4	1	0	0	0	0	0	1	1	0	0	1	0	0	0	4	4	3	3	3	3	4	4	4	3	4	3	2
1	1	4	5	5	4	1	1	0	0	0	0	1	0	0	0	0	0	0	0	4	4	1	4	1	5	5	5	5	1	1	1	2
2	1	4	5	4	4	1	0	0	0	0	1	0	0	0	0	0	0	0	0	5	5	2	5	2	4	2	3	2	1	2	5	2
2	1	4	5	3	4	1	0	0	0	0	0	0	0	1	1	1	0	0	0	3	5	1	1	1	1	2	2	4	1	2	3	2
1	1	4	5	4	4	1	1	0	0	0	1	0	0	0	0	0	0	0	0	4	4	4	3	4	4	3	4	3	2	3	3	2
2	1	4	5	4	4	1	0	0	0	0	0	0	0	0	0	0	0	0	0	4	5	3	5	1	4	5	5	3	3	2	3	2
2	1	4	5	4	4	0	0	0	0	0	0	0	0	0	0	0	0	0	1	5	5	1	1	1	1	5	5	5	5	4	2	2
1	1	4	5	5	4	1	0	0	0	0	0	0	0	0	0	0	0	0	0	4	4	3	3	2	3	4	4	4	3	3	3	2
2	1	4	5	4	4	1	1	0	0	0	1	0	0	0	0	1	0	0	0	5	3	1	1	1	1	4	4	3	1	3	5	2
2	1	4	5	4	4	1	0	0	0	0	0	0	0	0	0	0	0	0	0	5	5	3	2	1	5	4	5	5	2	3	5	2
2	1	4	5	4	4	1	0	0	0	0	0	0	0	0	0	0	0	0	0	3	5	2	3	2	4	3	5	3	1	3	5	2
2	1	4	5	3	3	1	0	0	0	0	0	0	1	0	0	0	0	0	0	5	5	1	1	2	2	4	4	4	4	2	2	2
1	1	4	5	5	3	1	0	0	0	0	0	0	0	1	0	0	0	0	0	4	4	4	4	3	4	4	3	4	4	4	4	2
1	1	4	5	3	3	1	0	0	0	0	0	0	0	0	0	0	0	0	0	5	5	3	3	3	3	3	3	3	3	3	3	2
1	1	4	5	4	3	1	0	0	0	0	0	0	0	0	0	0	0	0	0	3	4	3	3	3	2	2	4	3	3	3	3	2
2	1	4	5	5	3	1	0	0	0	0	1	0	0	0	0	0	0	0	0	4	1	1	1	1	1	3	4	5	1	5	5	2
2	1	4	5	5	3	1	0	0	0	0	0	0	0	0	0	0	0	0	1	3	4	4	4	3	4	3	5	3	3	4	1	2
2	1	4	5	5	3	1	0	0	1	0	0	0	0	0	0	1	0	0	0	3	3	3	4	1	1	1	5	1	1	2	3	2
2	1	4	5	4	3	1	0	0	0	0	1	0	0	1	0	1	0	0	0	3	4	2	5	1	2	1	5	3	2	3	3	2
2	1	1	5	5	4	1	0	0	0	0	0	0	0	0	0	0	0	0	0	1	2	1	2	1	1	2	2	1	1	2	2	2
2	1	4	5	5	3	1	1	0	0	0	0	0	0	0	0	0	0	0	0	4	5	2	1	2	1	1	1	1	1	2	1	2
2	1	4	5	5	3	1	0	0	0	1	0	0	0	0	0	0	0	0	0	1	1	1	1	2	3	3	3	2	2	4	1	2
2	1	4	5	3	3	1	0	0	0	1	1	0	0	0	0	0	0	0	0	4	3	2	3	2	2	1	4	2	1	4	2	2
2	1	4	5	4	3	1	0	0	0	0	0	0	0	0	0	0	0	0	0	4	4	1	1	1	1	2	1	1	1	2	2	2
2	1	4	5	4	3	1	0	0	0	0	0	1	0	0	0	0	0	0	0	5	5	4	3	3	5	2	5	2	1	3	5	2
1	1	4	5	5	3	1	0	0	0	0	0	1	0	0	0	0	0	0	1	4	4	3	2	2	3	3	2	3	3	2	3	2
1	1	4	5	3	3	1	0	0	0	0	0	0	0	1	0	0	0	0	0	4	4	2	3	1	2	3	3	3	3	4	3	2
1	1	4	5	4	3	1	0	0	0	0	0	0	1	0	0	0	0	0	0	3	3	3	3	3	3	3	2	2	2	2	2	2
2	1	4	5	4	3	1	0	1	0	1	1	1	0	0	0	1	0	0	0	5	5	1	1	1	2	4	3	5	1	4	5	2
2	1	4	5	5	5	1	1	0	0	1	1	1	0	0	0	1	0	0	0	5	5	4	3	2	4	3	5	1	1	2	3	2
2	1	4	5	5	4	1	0	0	0	0	0	0	0	0	0	0	0	0	0	5	5	1	2	2	2	3	4	3	1	2	3	2
1	1	4	5	4	5	1	0	0	0	0	0	0	0	0	0	0	0	0	1	3	4	1	3	1	2	2	3	2	1	2	1	2
1	1	4	5	5	5	1	0	0	0	0	0	0	0	0	0	0	0	0	0	3	3	3	3	4	4	4	4	2	2	2	4	2
1	1	4	5	4	5	1	1	0	0	0	0	0	0	0	0	0	0	0	0	5	5	3	2	3	3	5	5	5	5	3	3	2
2	1	4	5	5	4	0	0	0	0	0	0	0	0	0	0	0	0	0	1	3	3	3	3	1	1	3	3	1	1	3	3	2
1	1	4	9	4	5	1	0	1	0	0	0	0	0	0	0	0	0	0	0	4	4	1	2	2	3	3	4	4	2	2	4	2
2	1	1	5	3	4	0	0	0	0	0	0	0	0	0	0	0	0	0	1	5	5	5	5	5	5	5	5	5	5	1	5	2
2	1	4	9	4	5	0	0	0	0	0	0	0	0	0	0	0	0	0	1	5	4	2	3	2	3	3	3	3	3	3	5	2
2	1	4	5	4	5	1	0	0	0	0	0	0	0	0	0	0	0	0	0	4	4	2	5	2	4	4	5	3	2	3	5	2
1	1	4	5	4	4	1	1	0	0	0	0	1	1	1	0	0	0	0	0	3	4	1	3	2	3	3	4	3	2	3	2	2
2	1	4	5	4	5	0	0	0	0	0	0	0	0	0	0	0	0	0	1	3	3	3	3	4	4	4	4	4	4	4	3	2
2	1	4	5	4	4	1	0	0	0	0	1	0	0	0	0	0	0	0	0	5	5	3	4	2	4	4	4	4	4	4	5	2
2	1	4	5	5	4	1	0	0	0	1	0	0	0	0	0	0	0	0	0	2	2	3	5	1	3	3	5	3	3	2	4	2
2	1	4	5	3	6	1	0	0	0	0	1	1	0	0	0	0	0	1	0	5	5	1	1	4	4	5	4	3	1	1	1	2
2	1	4	2	4	5	1	1	0	0	0	0	0	0	0	0	0	0	0	0	4	4	2	3	1	2	4	4	4	2	3	5	2
2	1	4	5	4	5	1	0	0	0	0	0	0	1	0	0	0	0	0	0	5	5	3	4	3	5	3	5	4	3	2	5	2
2	1	4	5	5	4	1	0	0	0	0	0	0	0	1	0	0	0	0	1	5	5	5	5	5	5	5	5	3	5	3	3	2
1	1	4	5	4	5	1	0	1	0	0	0	0	1	0	0	0	1	0	0	4	4	3	4	2	5	4	5	3	2	4	1	2
1	1	4	5	5	5	1	1	0	0	0	1	1	1	0	0	0	0	0	0	5	5	1	5	1	1	5	5	5	1	4	5	2
2	1	4	5	4	4	1	0	0	0	0	1	1	0	0	0	1	0	0	0	5	5	3	4	2	1	5	5	5	1	4	2	2
2	1	3	5	4	4	1	0	0	0	0	0	0	0	0	0	0	0	0	1	5	5	1	1	1	2	1	3	2	3	2	1	2
1	1	4	5	5	3	1	1	0	0	0	0	0	0	0	0	0	0	0	0	3	4	2	2	3	4	3	4	3	3	3	2	2
2	1	4	5	5	3	1	0	0	0	0	0	0	0	0	0	0	0	0	0	4	4	2	3	2	2	4	4	5	3	4	2	2
2	1	1	5	5	4	1	0	0	0	0	0	0	0	0	0	0	0	0	0	5	5	1	3	1	3	1	4	3	1	4	5	2
2	1	4	5	4	5	1	0	0	0	0	0	0	0	0	0	0	0	0	0	1	1	1	1	1	1	4	4	1	1	3	3	2
2	1	4	5	4	4	1	0	0	0	0	0	0	0	0	0	0	0	0	0	5	5	4	2	2	3	3	4	3	3	3	2	2
1	1	4	9	5	5	1	0	0	0	0	0	0	0	0	0	0	0	0	0	3	5	2	3	2	2	3	4	1	2	2	5	2
2	1	1	5	5	4	1	0	0	0	0	1	0	1	0	0	0	0	0	1	5	5	4	3	3	3	3	5	5	3	4	3	2
2	1	4	5	5	4	1	0	0	0	0	0	0	0	0	0	0	0	0	0	3	3	1	1	1	1	3	1	1	1	1	3	2
1	1	4	4	5	5	1	0	1	0	1	0	0	1	0	0	1	0	0	0	4	4	3	4	3	3	3	3	1	4	4	3	2
2	1	1	5	2	5	1	0	0	0	1	0	0	0	0	0	0	0	0	0	5	5	5	5	5	5	5	5	5	5	5	5	2
2	1	4	5	5	5	1	0	0	0	0	0	0	0	0	0	0	0	0	0	2	2	2	1	1	4	3	1	1	1	1	4	2
2	1	4	5	3	4	1	0	1	0	0	1	1	0	0	0	1	0	0	0	5	5	1	5	1	2	5	2	1	1	3	3	2
2	1	4	5	5	5	0	0	0	0	0	1	0	0	0	0	0	0	0	0	5	5	1	3	3	3	3	3	3	3	3	1	2
2	1	4	5	4	4	1	0	1	0	0	0	0	0	0	0	0	0	0	0	4	4	2	5	1	4	4	5	2	3	3	2	2
2	1	4	5	4	3	1	0	0	0	0	0	0	0	0	0	0	0	0	1	4	4	1	2	1	1	3	1	1	2	3	4	2
2	1	4	5	3	5	1	0	0	0	0	1	0	1	0	1	0	0	0	0	5	4	3	2	3	3	4	4	4	1	3	4	2
1	1	4	5	5	3	1	0	0	0	0	0	0	0	0	0	0	0	0	0	5	5	2	4	1	3	3	4	3	3	3	4	2
1	5	4	2	2	4	0	0	0	0	0	0	0	0	0	0	1	1	1	0	4	5	1	4	1	1	1	4	1	2	1	4	2
2	1	4	5	5	3	1	0	0	0	0	1	0	0	0	0	0	0	0	1	4	4	4	5	3	4	5	3	3	3	3	4	2
2	4	5	1	4	5	1	1	1	0	0	0	0	0	0	0	0	1	1	1	5	5	1	5	5	5	5	5	5	5	5	1	2
2	2	2	1	3	5	1	0	0	0	0	0	0	0	0	0	0	0	0	0	4	3	2	3	2	3	5	5	3	3	4	3	2
1	4	5	9	4	5	1	1	1	0	0	0	0	0	0	0	0	1	1	1	5	5	5	5	5	5	5	5	5	5	5	1	2
1	1	4	3	4	4	1	0	0	0	0	0	0	0	0	0	0	0	0	0	2	4	1	1	1	3	4	5	3	2	1	1	2
2	1	4	5	5	4	1	1	0	0	0	1	0	1	1	0	0	0	0	1	4	4	2	2	3	4	3	4	2	1	3	3	2
1	1	4	5	4	4	1	0	0	0	0	1	0	0	1	0	0	0	0	0	3	3	3	1	1	1	5	5	3	4	2	5	2
2	1	4	3	5	3	0	1	0	0	1	0	0	1	0	0	0	0	0	0	4	4	3	2	2	4	4	5	4	4	4	2	2
2	1	4	5	4	4	1	0	1	0	0	0	0	0	0	0	0	0	0	0	3	5	1	4	1	4	1	5	1	1	4	3	2
2	2	3	9	3	4	1	0	0	0	0	1	0	0	0	0	0	0	0	0	5	5	5	5	4	5	5	5	5	4	3	3	2
2	1	4	5	5	4	1	1	0	0	0	1	1	0	0	0	0	0	0	0	5	5	4	4	4	4	4	5	2	3	5	5	2
1	3	2	9	3	4	0	0	0	0	0	0	0	0	0	0	0	0	0	1	2	2	2	4	4	5	5	5	5	4	4	5	2
1	1	4	9	3	4	1	0	0	0	0	0	0	0	0	0	0	0	0	0	3	3	1	4	1	3	3	3	2	2	2	2	2
2	1	4	9	4	4	1	0	0	0	0	0	0	1	0	0	1	0	0	0	5	5	5	5	1	1	5	5	3	5	2	2	2
1	1	3	8	4	4	0	0	0	0	0	0	0	0	0	0	0	0	0	1	1	1	1	1	1	2	3	2	2	1	1	1	2
2	2	3	8	5	4	0	0	0	0	0	0	0	0	0	0	0	0	0	1	3	2	2	2	2	2	4	5	5	5	4	1	2
1	2	4	8	4	4	0	0	0	0	0	0	0	0	0	0	0	0	0	1	5	5	4	4	1	3	4	4	4	4	3	5	2
1	2	2	9	5	4	1	0	0	0	0	0	0	0	0	0	0	0	0	1	1	2	2	3	2	2	2	3	3	3	2	2	2
1	3	2	9	4	5	1	0	0	0	0	1	0	0	0	0	0	0	0	0	4	3	1	1	2	1	4	4	2	2	3	2	2
1	2	2	6	3	5	1	0	0	0	0	0	0	0	0	0	0	0	0	0	3	4	4	5	4	5	5	4	2	4	3	1	2
2	4	3	1	2	4	0	0	0	0	0	0	0	0	0	0	0	0	0	1	4	5	4	4	1	4	4	5	4	3	4	1	2
1	3	4	4	3	4	0	0	0	0	1	0	0	0	0	0	0	0	0	0	3	4	3	4	3	4	3	3	1	2	3	5	2
1	3	3	9	3	4	1	0	1	0	0	0	0	0	0	0	0	1	0	0	3	4	1	4	1	4	4	4	2	3	2	1	2
2	4	2	1	5	4	0	0	0	0	0	0	0	0	0	0	1	0	0	1	5	5	5	5	5	5	5	5	5	5	5	1	2
1	5	5	9	5	4	0	0	0	0	0	0	0	0	0	0	0	1	0	0	5	3	3	3	3	3	5	3	1	5	2	1	2
2	2	3	1	4	4	1	1	1	0	0	0	0	1	0	0	0	1	0	0	3	3	2	4	4	4	4	4	4	2	2	3	2
1	2	4	3	3	4	1	0	0	0	0	1	1	1	1	0	1	0	0	0	2	1	1	4	1	1	3	1	1	2	3	2	2
1	1	3	8	4	4	1	0	0	0	0	0	0	0	0	0	0	0	0	1	4	4	1	3	2	5	3	5	4	2	2	1	2
2	3	2	9	5	4	0	0	0	0	0	0	0	0	0	0	0	1	0	0	4	3	4	4	1	4	4	5	5	4	2	1	2
1	4	3	9	5	4	0	0	0	0	0	0	0	0	0	0	0	1	1	0	5	4	4	4	1	5	5	5	2	5	3	1	2
2	1	3	1	4	4	1	0	0	0	0	0	0	1	0	0	0	0	0	0	5	5	2	4	1	3	5	4	4	2	4	3	2
1	3	2	9	4	4	1	0	0	0	0	1	0	1	0	0	0	0	0	0	3	4	3	2	3	4	3	4	4	2	4	5	2
1	3	3	6	5	4	1	0	0	0	0	0	0	0	0	0	0	0	0	0	3	3	2	4	4	5	5	5	5	5	5	1	2
2	2	5	1	5	4	1	0	0	0	0	0	0	0	0	0	0	0	0	0	4	4	2	3	1	3	4	4	4	5	5	1	2
1	2	4	3	5	4	1	0	0	0	1	0	0	0	0	0	1	0	0	0	4	4	2	4	1	3	4	5	3	3	2	3	2
1	1	3	6	5	4	1	0	0	1	0	0	0	0	0	0	1	0	0	0	3	4	1	5	2	4	5	5	4	5	3	2	2
1	1	1	5	4	5	1	0	0	0	0	0	0	0	0	0	1	0	0	0	5	5	4	4	3	3	4	4	4	4	4	2	2
2	1	1	5	4	5	1	0	0	0	0	0	0	0	0	0	0	0	0	0	2	2	3	1	2	2	5	4	4	3	3	2	2
2	1	1	5	5	4	1	1	0	0	1	0	0	0	0	0	0	0	0	0	5	5	5	5	3	3	3	3	3	3	3	3	2
2	1	1	5	5	3	1	0	1	0	0	0	1	0	0	0	1	0	1	0	4	5	3	2	3	4	5	5	3	1	5	3	3
2	1	4	5	3	5	1	1	1	0	0	0	0	0	0	0	0	0	0	0	3	4	1	1	3	3	3	3	5	3	3	2	3
1	1	4	5	5	4	1	0	0	0	0	0	0	0	0	0	0	0	0	0	4	4	4	4	4	4	4	5	4	4	4	4	3
1	1	4	5	3	4	1	1	0	0	0	1	0	0	0	0	0	0	0	0	5	5	4	3	2	3	5	5	2	2	5	5	3
1	4	2	6	3	4	1	0	0	0	0	0	0	0	0	0	0	0	0	0	5	5	5	5	5	5	5	5	4	5	2	4	3
1	1	4	5	3	4	1	0	0	0	0	0	0	0	0	0	0	0	0	0	3	3	3	3	3	3	3	3	3	3	3	3	3
2	1	1	5	3	2	1	1	1	0	1	0	0	0	1	0	1	0	0	0	3	3	4	3	4	2	4	4	3	3	3	4	3
1	1	1	5	3	5	1	0	0	0	0	1	1	1	1	0	0	0	1	0	3	5	3	4	3	4	4	4	3	4	2	3	3
2	1	1	3	3	5	1	0	0	0	0	1	0	0	0	0	0	0	0	0	4	4	4	3	2	3	4	4	3	2	3	4	3
2	1	4	5	4	4	1	0	0	0	0	1	0	1	1	0	1	0	0	1	4	4	1	2	3	3	3	3	2	2	2	2	1
2	1	4	5	4	4	1	0	1	0	1	0	0	0	0	0	0	1	0	0	3	3	2	2	1	1	3	5	3	1	3	2	1
2	1	4	5	5	4	1	0	0	0	0	0	0	0	0	0	0	0	0	0	4	4	4	4	4	4	4	4	4	4	4	4	1
2	1	4	5	3	3	1	0	0	0	0	1	0	0	0	0	0	0	0	0	5	4	3	2	1	1	4	4	3	2	3	4	1
2	1	4	5	5	4	1	0	0	0	0	0	0	0	0	0	0	0	0	0	3	1	1	3	1	5	5	5	3	1	5	5	1
2	1	1	5	4	4	1	0	0	0	0	0	1	0	0	0	0	0	0	1	5	5	3	3	1	1	4	4	3	3	4	1	1
2	1	4	5	5	4	1	0	1	0	0	0	0	0	0	0	0	0	0	0	3	5	1	3	1	5	5	5	4	3	4	1	1
2	1	4	5	2	4	1	1	0	0	0	1	1	0	1	0	0	0	0	0	3	3	1	2	1	3	3	4	3	3	2	3	1
1	1	4	5	3	4	1	1	0	0	0	0	0	1	0	0	0	0	0	0	4	5	4	4	4	4	4	3	4	4	4	4	1
2	1	4	5	4	4	1	0	0	0	0	1	0	0	1	0	0	0	0	0	4	4	1	3	2	3	3	3	1	1	4	4	1
2	1	4	5	4	4	1	0	0	0	0	1	0	0	0	0	1	0	0	0	5	3	3	2	3	2	4	4	4	4	4	4	1
2	1	4	5	3	1	1	1	1	0	0	1	1	0	0	0	1	0	1	0	4	5	3	5	3	4	5	5	5	5	4	4	1
1	1	1	5	5	1	1	1	0	0	0	0	0	0	0	0	0	0	0	0	2	2	2	2	2	3	5	4	3	3	4	3	1
2	1	1	5	4	1	1	0	0	0	0	1	1	0	0	0	1	0	0	0	5	5	5	5	1	3	1	4	4	3	3	3	1
2	1	1	5	5	4	1	0	1	0	0	1	0	0	0	0	0	0	0	0	5	5	3	3	3	4	3	5	5	3	4	5	1
2	1	4	5	3	4	1	1	0	0	0	1	0	0	1	0	1	0	0	0	5	5	5	5	5	5	5	5	5	5	3	5	1
2	1	4	5	3	4	1	0	0	0	0	0	0	0	0	0	0	0	0	0	4	4	3	4	1	3	4	4	1	1	4	3	1
1	2	5	4	4	6	0	0	1	0	0	0	0	0	0	0	0	0	0	1	5	1	4	5	2	2	5	5	5	1	5	4	1
2	1	4	3	4	4	1	0	1	0	0	0	0	0	0	0	0	0	0	0	4	4	4	3	1	3	3	5	4	1	2	2	1
2	1	4	5	4	4	1	0	1	0	0	0	0	0	1	0	0	1	0	0	4	3	1	2	1	1	3	5	1	1	3	5	1
2	1	4	5	5	6	1	0	0	0	0	0	0	0	0	1	0	0	0	0	5	5	3	5	3	1	5	5	3	3	3	5	1
2	1	4	5	5	4	1	0	0	0	0	0	0	1	0	0	0	0	0	0	1	1	1	1	1	1	4	5	2	2	1	1	1
1	1	4	5	1	4	1	0	0	0	0	1	0	0	0	0	0	0	0	0	5	5	5	5	5	5	5	5	5	5	4	4	1
2	2	3	3	3	6	0	1	0	0	0	0	0	0	0	0	0	0	0	0	2	2	1	1	1	1	1	1	1	1	1	1	1
2	1	4	5	3	4	1	1	0	1	1	1	1	1	1	0	1	0	0	0	5	2	1	5	1	5	1	5	5	1	3	5	1
2	1	4	5	5	6	1	0	1	0	0	0	0	1	1	0	0	0	0	0	5	5	3	2	1	1	4	2	3	3	3	5	1
1	1	1	5	5	1	1	0	0	0	1	1	0	0	0	0	0	0	0	0	5	5	4	5	3	5	5	5	4	5	3	5	1
2	1	4	5	5	4	1	1	1	0	1	0	0	1	1	0	0	0	0	0	4	5	4	3	3	3	4	4	4	3	4	5	1
2	1	4	5	5	4	1	0	0	0	0	0	0	0	0	0	1	0	0	0	4	4	3	4	1	3	5	5	3	2	2	2	1
2	1	4	5	5	4	1	0	0	0	0	0	0	0	0	0	0	0	0	0	3	3	1	1	1	1	3	3	3	3	3	3	1
1	1	4	5	3	4	0	0	0	0	0	0	0	0	0	0	0	0	1	0	5	5	5	5	3	4	4	4	4	4	2	5	1
2	1	2	7	2	5	0	0	1	0	0	0	0	0	0	0	0	0	0	0	3	1	2	1	1	5	5	5	2	5	3	1	1
2	1	4	5	5	5	0	0	0	0	0	0	0	1	0	0	0	0	0	0	1	1	1	5	1	5	1	5	5	1	3	5	1
2	1	4	5	4	4	1	1	1	0	1	1	0	1	0	0	0	1	0	0	5	5	2	2	2	2	2	2	4	3	4	3	1
2	1	4	5	3	4	1	1	0	0	0	0	1	0	0	0	1	0	0	0	5	4	5	3	3	1	1	1	1	1	4	5	1
1	1	4	6	4	5	0	0	0	0	0	0	0	0	0	0	0	0	0	1	5	5	3	4	3	4	3	5	4	5	3	5	1
2	1	4	5	3	5	1	1	0	0	0	1	0	0	0	0	1	0	0	0	3	1	4	1	1	1	5	5	5	1	3	5	1
1	1	4	5	5	4	1	0	0	0	0	0	0	0	0	0	0	0	0	1	4	4	4	4	4	4	5	5	5	4	3	5	1
2	1	4	5	3	4	1	0	0	0	1	0	1	0	0	0	1	0	0	0	4	4	2	1	1	2	1	4	1	1	2	1	1
2	1	4	5	5	4	1	0	0	0	0	0	0	0	0	0	1	0	0	0	4	4	3	2	3	2	2	2	3	3	2	4	1
2	1	1	5	3	1	0	0	0	1	0	0	0	0	0	0	1	0	0	0	5	5	2	2	2	2	2	2	2	2	1	3	1
1	1	4	5	5	1	0	0	0	0	0	0	0	0	0	0	0	0	0	1	5	5	5	5	5	5	5	5	5	5	3	5	1
2	2	3	2	2	3	0	0	0	0	0	1	0	0	0	0	0	0	0	0	5	5	5	5	4	4	4	4	4	5	5	5	1
2	1	4	5	3	4	0	0	0	0	0	0	1	0	0	0	1	0	0	0	4	5	3	4	4	4	5	5	4	4	4	4	1
2	1	4	5	4	4	1	0	0	0	0	0	0	0	0	0	0	0	0	0	4	4	2	1	1	3	4	4	4	4	4	4	1
1	1	4	5	4	4	0	0	0	0	0	0	0	0	0	0	0	0	0	1	4	4	4	4	4	4	4	4	4	4	4	4	1
2	1	4	5	4	1	1	0	1	0	0	1	0	0	0	0	0	0	0	0	4	4	3	2	1	1	5	5	5	5	5	5	1
2	1	4	5	5	4	1	0	0	0	0	0	0	0	0	0	0	0	0	0	4	2	3	3	3	3	3	3	3	3	3	5	1
2	1	4	5	4	1	1	0	0	0	0	0	0	0	0	0	0	0	0	0	4	3	2	3	2	2	3	2	2	2	2	2	1
2	1	4	5	5	1	1	0	0	0	0	0	0	1	0	0	0	0	0	0	3	4	2	3	1	3	4	4	4	2	3	4	1
1	1	4	5	3	4	1	0	0	0	0	0	0	0	0	0	0	0	0	0	4	4	2	4	4	4	4	4	3	3	4	4	1
2	1	4	5	5	4	1	0	0	0	0	0	0	0	0	0	0	0	0	0	5	5	1	1	1	1	1	1	1	1	2	5	1
1	1	1	5	4	5	1	0	0	0	0	1	0	0	0	0	1	0	0	0	5	5	3	3	1	3	5	5	5	5	5	5	1
1	1	4	5	4	6	0	0	0	0	0	0	0	0	0	0	0	0	0	1	3	4	2	4	3	3	3	3	3	3	3	4	1
2	1	4	5	3	4	1	0	0	0	0	0	0	0	0	0	0	0	0	0	4	4	4	4	4	4	4	4	3	3	4	3	1
1	1	4	5	5	4	1	1	0	0	0	0	0	1	0	0	0	0	0	0	3	4	3	2	3	3	2	3	3	4	3	2	1
1	1	4	9	5	4	0	0	0	0	0	0	0	1	1	0	0	0	0	0	5	5	3	3	3	5	5	5	5	3	3	2	1
1	1	4	5	4	4	1	0	0	0	0	0	1	0	0	0	0	0	0	0	5	5	5	3	2	4	4	5	2	1	3	4	1
2	1	4	5	5	4	1	0	0	0	0	0	0	0	0	0	0	0	0	0	5	5	1	5	1	1	5	5	3	2	5	5	1
2	1	4	5	4	2	1	0	0	0	1	1	0	1	1	0	0	1	1	0	5	2	3	3	2	2	2	2	2	2	3	3	1
2	1	4	2	4	6	0	0	1	0	0	0	0	0	0	0	0	0	0	0	1	5	1	1	1	5	5	5	5	5	5	5	1
2	1	4	5	4	6	1	0	0	0	0	0	1	0	0	0	0	0	0	0	5	4	2	2	1	3	4	1	1	1	3	5	1
1	1	4	6	4	4	1	0	0	0	0	0	0	0	0	0	0	0	0	0	4	5	3	3	2	3	5	5	5	5	3	4	1
1	1	4	5	3	4	1	0	0	0	0	0	0	0	0	0	1	0	0	0	3	3	4	2	1	1	3	4	4	5	3	3	1
2	1	4	5	3	5	1	1	0	0	0	0	0	0	0	0	0	0	0	0	1	2	2	3	2	1	5	5	5	5	5	2	1
2	1	4	5	4	3	1	0	0	0	0	0	0	1	0	0	1	0	0	0	4	3	2	2	2	3	4	5	2	4	4	3	1
2	1	4	5	4	4	1	0	0	0	0	0	0	0	0	0	0	0	0	0	5	5	5	5	4	4	4	5	4	1	4	3	1
1	3	2	8	5	4	1	0	0	0	0	1	0	0	0	0	1	1	0	0	5	5	2	4	2	3	4	4	1	4	3	5	1
2	1	4	5	3	4	1	0	0	0	0	0	0	0	0	0	0	0	0	1	5	4	1	5	1	5	5	5	5	1	3	5	1
2	1	4	5	4	4	1	0	0	0	0	1	0	0	0	0	0	0	0	0	4	4	1	2	1	3	3	3	1	1	3	4	1
1	1	1	5	4	4	0	0	0	0	0	0	0	1	1	0	0	0	0	0	1	4	2	2	3	2	1	4	1	1	5	2	1
2	1	4	5	4	5	1	0	0	0	0	0	0	0	1	0	0	0	0	0	4	3	1	2	1	3	4	5	3	3	3	3	1
2	1	4	5	4	4	1	0	0	0	0	0	0	1	1	0	1	0	0	0	4	4	2	3	1	1	4	4	1	1	4	5	1
2	1	4	5	4	1	1	1	0	0	0	0	0	0	0	1	0	0	0	0	5	5	2	2	2	4	5	5	4	2	3	5	1
2	1	4	4	4	4	1	0	0	0	0	0	0	0	0	0	0	0	0	0	5	4	3	1	2	4	3	4	3	3	3	5	1
2	1	4	5	3	4	1	1	0	0	0	0	1	0	0	0	1	1	0	0	4	5	2	4	2	4	5	5	2	2	3	5	1
2	1	4	5	3	4	1	1	0	0	1	0	0	0	0	0	0	0	0	0	2	4	1	2	1	1	2	5	3	1	2	3	1
2	1	4	5	4	2	1	0	0	0	0	0	0	0	0	0	1	0	0	0	4	4	2	3	3	3	4	3	3	2	3	5	1
2	1	4	5	5	4	1	1	0	0	0	0	0	0	0	0	0	0	0	0	3	3	1	2	1	3	4	4	2	3	3	4	1
1	1	4	5	3	2	1	0	0	0	0	0	0	0	1	0	0	0	0	0	4	4	2	5	1	3	5	5	4	1	2	3	1
2	1	4	5	3	5	1	1	1	1	0	1	1	0	1	0	0	0	0	0	4	3	4	3	3	3	3	3	3	2	4	4	1
2	3	2	1	4	2	1	0	0	0	0	0	0	0	0	0	0	0	0	0	5	5	1	1	1	1	1	5	5	1	5	1	1
1	1	4	5	4	4	1	1	0	0	0	0	0	0	0	0	1	0	0	0	5	5	3	3	2	3	4	5	2	2	3	4	1
1	1	4	5	3	1	0	0	1	0	0	0	0	0	0	0	0	0	0	0	2	2	1	1	2	1	1	1	1	1	1	2	1
2	1	4	5	3	4	1	1	1	0	0	0	1	0	0	1	1	0	0	0	3	3	2	1	1	2	4	5	2	1	3	3	1
1	1	4	3	4	1	1	1	0	0	0	0	1	0	0	0	0	0	0	0	5	3	1	3	1	4	3	3	3	1	3	1	1
1	1	4	5	5	4	1	0	0	0	0	1	0	0	0	0	0	0	0	0	5	5	1	5	5	5	5	5	5	5	5	1	1
2	1	4	1	3	5	1	0	0	0	0	0	1	0	1	1	1	0	0	0	3	3	3	3	3	1	5	3	1	1	2	1	1
1	1	4	5	5	4	1	0	0	0	0	1	0	0	0	0	0	0	0	0	2	2	1	3	1	1	4	4	2	2	2	5	1
2	1	4	5	3	5	1	1	0	0	0	1	0	0	0	0	0	0	0	0	4	2	1	2	1	1	1	4	1	1	2	5	1
1	1	4	5	3	2	1	0	0	0	0	0	0	0	0	0	0	0	0	0	3	4	3	4	2	3	5	5	4	5	4	4	1
2	1	4	5	4	2	1	0	0	0	0	0	0	0	0	0	0	0	0	0	1	1	1	2	1	2	5	5	2	2	2	3	1
2	1	4	5	4	4	1	0	0	0	0	0	0	0	0	0	0	0	0	0	3	3	1	3	3	3	3	3	3	3	2	3	1
2	1	4	5	4	2	1	0	0	0	0	1	0	0	0	0	0	0	0	0	5	5	2	1	1	4	3	5	1	2	4	3	1
2	1	1	2	3	4	1	0	0	0	0	0	0	0	0	0	0	0	0	0	2	2	2	2	2	2	2	2	2	2	2	2	1
1	1	4	5	5	2	1	0	1	0	0	0	0	0	0	0	0	0	0	0	4	4	3	4	3	3	3	3	3	3	3	3	1
2	1	4	5	4	2	1	0	0	0	0	0	0	1	0	0	0	0	0	0	4	4	3	3	3	3	3	3	3	3	3	3	1
2	1	4	5	4	4	1	1	0	0	0	1	0	0	0	1	1	0	0	0	2	2	1	2	1	1	2	2	2	2	2	2	1
2	1	4	5	4	2	1	1	0	0	0	0	1	0	0	0	0	0	0	0	3	3	1	1	1	1	4	4	4	1	4	5	1
2	1	4	5	4	2	1	0	0	0	0	0	1	1	0	0	0	0	0	0	4	4	4	3	1	3	5	5	5	2	2	3	1
1	1	4	5	3	4	1	0	0	0	0	0	0	0	0	0	0	0	0	0	4	4	2	2	2	2	2	2	2	2	3	3	1
2	1	4	5	3	4	1	0	0	0	0	0	1	0	0	0	0	0	0	0	3	3	4	4	3	4	4	5	4	4	3	4	1
2	1	4	5	3	2	1	0	0	0	0	1	0	0	0	0	0	0	0	0	5	5	3	3	3	3	3	3	3	3	3	3	1
1	1	4	5	3	4	1	0	0	0	0	1	0	0	0	0	0	0	0	0	4	4	1	4	1	4	4	4	4	3	4	1	1
1	1	4	5	3	4	1	0	0	0	0	0	0	0	0	0	0	0	0	0	4	4	2	4	2	4	5	5	5	4	4	1	1
1	2	4	3	3	5	1	0	1	0	0	0	0	0	0	0	0	0	0	0	4	3	3	4	1	1	4	4	3	3	3	4	1
2	1	4	5	5	4	1	1	1	0	0	1	0	0	0	0	1	0	0	0	5	5	3	3	3	4	4	5	3	3	3	5	1
2	1	4	5	3	4	1	0	0	0	0	1	0	0	0	0	0	0	0	0	4	4	3	5	5	5	5	5	4	5	4	4	1
2	1	4	5	3	4	1	0	0	0	0	0	0	0	0	0	0	0	0	0	2	2	3	3	4	4	3	4	3	4	3	3	1
2	1	1	5	4	2	1	0	0	0	0	0	1	0	0	0	0	0	0	0	4	4	1	4	1	1	3	4	1	1	3	3	1
2	1	4	5	4	4	1	0	0	0	0	0	0	0	0	0	0	0	0	0	4	4	1	1	1	1	3	3	3	3	2	3	1
2	1	4	5	3	4	1	1	0	0	0	0	0	0	0	0	1	0	0	0	3	5	1	3	2	2	2	4	2	1	1	4	1
2	1	1	5	4	6	1	0	0	0	0	0	0	0	1	0	0	0	0	0	3	3	1	3	1	1	4	4	1	1	3	3	1
1	1	4	5	4	4	0	1	0	0	0	0	0	0	0	0	0	0	0	0	3	3	2	3	2	3	3	5	3	3	4	3	1
2	1	4	5	3	4	1	0	0	0	0	0	0	0	0	0	1	0	0	0	3	3	2	2	1	1	3	4	4	2	4	4	1
2	1	4	5	3	4	1	0	0	0	0	0	1	0	1	0	0	0	0	0	5	3	1	5	1	2	5	5	3	3	3	2	1
2	1	4	5	4	4	0	0	0	0	0	0	0	0	0	0	0	0	0	1	4	4	1	1	1	4	4	5	4	1	3	5	1
1	1	3	9	3	2	1	0	0	0	0	0	1	0	0	0	0	0	0	0	4	4	1	4	3	3	4	5	3	1	3	1	1
2	1	4	5	4	4	1	0	0	0	0	0	0	0	0	0	0	0	0	0	4	1	1	1	1	1	4	4	2	1	4	5	1
1	1	3	8	3	5	1	0	0	0	1	0	0	0	0	0	0	0	0	0	2	1	5	1	3	3	4	5	5	2	3	3	1
2	1	4	5	5	4	0	0	0	0	0	0	0	0	1	0	0	0	0	0	5	5	4	4	2	5	4	5	5	5	5	5	1
1	1	4	5	1	4	1	0	0	0	0	0	0	0	0	0	0	0	0	0	4	4	1	4	1	3	4	4	5	1	4	4	1
1	1	3	9	4	4	0	0	0	0	0	0	0	0	0	0	0	0	0	1	1	1	1	5	1	3	3	3	3	3	3	3	1
2	1	4	5	5	2	1	0	0	0	0	0	0	0	0	0	0	0	0	0	5	5	1	2	2	5	4	5	2	2	5	2	1
2	1	4	3	2	1	1	0	0	0	0	0	0	0	0	0	0	0	0	0	5	5	1	1	1	1	5	5	1	3	3	1	1
1	1	4	5	3	5	1	1	0	0	0	0	1	1	1	0	0	0	0	0	5	5	1	3	3	5	5	5	3	1	5	5	1
1	1	4	5	3	5	0	0	0	0	0	1	0	0	0	0	0	0	0	0	2	3	1	1	1	1	2	3	2	2	2	2	1
1	1	4	9	3	5	1	0	0	0	0	0	0	0	1	0	0	0	0	0	4	4	3	2	1	1	3	5	4	3	4	5	1
1	1	4	6	2	4	1	0	0	0	0	0	0	0	0	0	1	0	0	0	3	3	1	2	2	2	3	2	2	2	3	5	1
1	1	4	5	2	4	1	0	0	0	0	0	0	0	0	0	0	0	0	0	4	4	4	4	3	3	1	4	4	4	4	4	1
2	1	4	5	5	4	1	0	0	0	0	0	1	0	0	0	0	0	0	0	4	5	1	5	3	5	5	5	5	5	5	5	1
2	1	4	5	3	4	1	0	0	0	0	1	0	0	0	0	1	0	0	0	3	3	2	1	3	3	2	4	2	2	2	2	1
2	1	4	5	4	2	1	0	0	0	0	0	0	0	0	0	0	0	0	0	3	3	3	3	3	3	3	3	3	3	3	3	1
2	1	4	5	5	4	1	0	1	0	0	0	0	0	0	0	1	0	0	0	5	5	5	4	3	4	4	5	4	5	4	2	1
2	1	4	5	3	2	1	0	0	0	0	0	1	0	0	0	0	0	0	0	5	4	4	4	2	4	3	4	4	3	2	3	1
2	1	4	5	3	4	1	1	1	0	0	0	0	0	0	0	0	0	0	0	5	4	3	4	2	3	1	3	4	1	3	5	1
1	2	1	2	5	4	1	1	0	0	0	1	0	0	0	0	1	1	1	0	2	5	4	1	1	1	3	3	2	3	3	5	1
2	1	4	5	3	4	1	1	0	0	0	0	0	0	0	0	0	0	0	0	3	3	1	4	1	2	1	4	1	1	3	2	1
2	1	4	5	5	4	1	0	0	0	0	0	1	0	0	0	1	0	0	0	5	2	1	1	1	2	5	3	1	1	2	2	1
2	1	4	5	2	4	1	1	0	0	0	0	0	0	0	0	0	0	0	0	3	3	4	4	2	2	4	5	2	2	4	5	1
2	1	4	5	5	4	1	0	0	1	0	0	0	0	0	0	1	0	0	0	4	4	4	4	5	3	4	5	1	4	3	5	1
2	1	4	5	4	4	1	0	1	0	0	1	1	0	1	0	1	0	0	0	5	5	5	5	5	4	4	3	3	3	2	1	1
1	1	4	5	5	4	1	1	0	0	0	0	0	0	0	0	1	0	0	0	3	3	3	3	3	3	3	3	3	3	3	3	1
1	1	4	5	3	4	0	0	0	0	0	0	0	0	0	0	0	0	0	1	1	1	1	1	1	1	1	1	1	1	1	1	1
1	1	4	5	3	4	0	0	0	0	0	0	0	0	0	0	0	0	0	1	2	2	5	5	5	4	5	5	5	5	5	5	1
1	1	4	5	5	4	1	1	0	0	0	0	1	0	0	0	0	0	0	0	5	2	2	2	2	2	4	5	5	2	5	5	1
1	1	4	5	3	4	1	0	0	0	0	1	1	0	1	0	1	0	1	0	5	5	4	5	4	4	5	5	5	3	3	3	1
2	2	1	5	3	2	1	1	0	1	0	1	0	0	0	0	0	0	0	0	4	4	4	4	4	4	4	4	4	4	4	4	1
2	1	4	5	5	4	1	1	0	0	0	0	0	1	0	0	1	0	0	0	4	4	3	4	3	4	4	3	4	3	4	4	1
1	1	4	5	3	4	0	0	0	0	0	0	0	0	0	0	0	0	0	1	3	3	2	3	2	2	2	3	3	3	3	3	1
2	1	4	5	4	4	1	0	0	0	0	0	0	0	0	0	0	0	0	0	5	3	1	2	1	1	3	4	3	3	2	3	1
2	2	1	2	4	4	0	0	0	0	0	0	0	0	0	0	0	0	0	1	5	5	3	5	3	5	5	5	5	5	5	1	1
1	1	3	9	5	5	1	0	0	0	0	0	0	0	0	0	0	0	0	0	4	3	4	3	1	1	5	5	1	1	5	2	1
2	2	1	2	3	4	1	0	0	0	0	0	0	1	1	0	0	0	0	0	4	4	3	4	3	4	4	4	3	3	4	4	1
1	1	1	5	4	4	1	0	0	0	0	0	0	1	1	0	0	0	0	0	3	3	4	4	1	2	4	4	2	1	4	5	1
2	1	1	5	3	4	1	1	0	0	0	1	0	0	0	0	0	0	0	0	5	5	4	3	3	3	3	3	4	4	4	4	1
2	1	4	5	5	4	1	0	0	0	0	0	0	0	0	0	1	0	0	0	2	1	1	3	1	1	3	3	3	3	1	1	1
2	3	3	6	4	4	0	0	0	0	0	0	0	0	1	0	0	0	0	0	2	4	1	1	1	1	4	5	1	1	2	1	1
1	1	3	4	3	5	1	0	1	0	0	0	0	1	1	0	0	0	0	0	5	5	5	5	5	5	5	5	5	5	5	5	1
2	1	1	5	3	5	1	0	0	0	0	1	1	0	0	0	0	1	0	0	3	3	1	1	1	1	1	1	1	1	3	5	1
1	1	4	5	3	4	1	1	0	0	0	0	0	0	1	0	0	0	0	0	5	5	2	3	1	5	5	5	5	5	5	3	1
1	1	2	9	5	5	0	0	0	0	0	0	0	0	0	0	0	0	0	1	3	3	3	3	3	3	3	3	3	3	3	3	1
2	1	4	5	5	4	1	0	0	0	0	0	0	0	0	0	0	0	0	0	2	2	1	3	2	3	2	3	3	1	2	2	1
2	1	4	5	3	4	1	0	0	0	0	0	0	0	0	0	1	0	0	0	3	3	2	1	3	3	3	2	2	2	4	5	1
1	1	4	5	5	4	0	0	0	0	0	0	0	0	0	0	0	0	0	1	1	3	3	2	3	3	3	3	3	3	3	3	1
2	1	4	5	3	4	1	0	0	0	0	0	0	0	0	0	0	0	0	0	4	4	3	3	3	3	3	3	3	3	4	5	1
1	3	1	7	4	4	1	0	1	0	0	0	1	0	1	0	1	1	0	0	5	4	3	4	4	4	5	4	5	3	4	5	1
2	1	4	5	4	4	1	0	1	0	0	0	0	0	0	0	0	0	0	0	2	2	1	3	2	3	2	3	3	1	3	3	1
1	2	4	7	4	4	1	1	0	0	1	1	0	1	1	0	0	0	0	0	5	5	4	4	5	5	5	5	5	4	4	5	1
1	2	1	7	5	4	1	1	1	1	1	1	1	1	1	0	0	1	1	0	5	4	1	3	4	3	4	3	3	3	2	2	1
2	3	4	7	3	4	1	0	0	0	0	1	0	0	1	0	0	0	0	0	5	5	4	4	3	5	5	5	4	5	3	5	1
1	4	4	4	2	4	0	0	0	0	0	0	0	0	1	0	0	0	0	0	4	5	5	5	5	5	5	5	1	5	4	4	1
2	1	1	7	4	4	1	0	0	0	0	0	0	0	0	0	0	0	0	0	2	2	2	2	2	2	2	4	4	2	3	3	1
2	1	4	5	3	4	1	0	0	0	0	0	0	0	0	0	0	0	0	1	3	1	4	4	1	3	5	5	3	2	2	3	1
1	1	1	7	4	4	1	0	0	0	1	1	1	0	0	0	0	0	0	0	4	4	3	4	2	3	4	4	4	2	3	3	1
2	2	4	7	4	4	1	1	0	1	0	1	1	1	1	0	0	1	1	0	4	4	2	4	1	4	4	4	1	1	2	2	1
2	2	4	7	4	4	1	1	1	1	1	1	1	1	1	1	1	1	1	0	3	3	1	2	1	2	4	4	4	2	2	2	1
2	1	4	7	5	4	1	0	0	0	0	0	0	0	0	0	0	0	0	0	4	2	2	3	1	2	3	5	3	2	2	3	1
1	1	4	5	5	4	1	0	0	0	0	0	0	0	0	0	0	0	0	0	4	4	1	3	1	1	1	4	1	1	2	2	1
1	2	4	7	4	2	1	1	1	0	1	1	0	1	1	1	0	1	1	0	4	4	4	4	4	4	4	4	4	4	3	4	1
2	1	4	7	3	4	1	0	0	0	0	0	0	0	0	0	0	0	0	0	4	3	3	2	1	2	4	4	3	2	2	5	1
2	1	1	5	4	4	1	0	0	0	0	0	0	0	0	0	0	0	0	0	2	4	3	2	2	1	4	4	2	2	4	2	1
2	1	4	5	3	4	1	0	1	0	0	0	0	0	0	0	1	0	0	0	4	4	4	5	4	5	4	5	5	3	3	4	1
1	1	4	5	5	2	1	1	1	1	1	1	0	0	1	0	1	1	0	0	4	4	3	4	1	4	4	4	4	2	3	4	1
2	1	4	5	3	4	1	0	0	0	0	0	0	0	0	0	1	0	0	0	4	4	3	4	1	3	1	4	2	1	3	5	1
2	1	4	5	5	4	1	1	0	0	0	0	0	1	0	0	1	0	0	0	5	3	3	3	2	4	4	4	3	2	3	4	1
1	1	4	5	3	4	1	0	0	0	0	0	0	0	0	0	0	0	0	0	4	5	4	4	3	3	5	5	4	5	3	4	1
2	1	4	7	4	4	1	0	0	0	0	1	0	0	0	0	0	0	0	0	4	4	1	3	2	3	4	5	3	4	2	1	1
2	1	1	7	4	4	1	1	1	0	0	1	0	1	1	0	0	0	0	1	4	5	4	4	3	4	4	5	4	3	4	3	1
1	2	2	6	5	4	1	0	0	0	0	0	0	0	0	0	0	0	0	0	3	5	1	2	3	3	1	3	4	1	3	1	1
2	1	4	5	4	4	1	0	0	0	0	0	0	0	0	0	1	0	0	0	4	4	3	4	3	4	4	4	4	3	3	3	1
1	1	4	7	3	4	1	0	1	0	0	0	0	0	1	0	0	0	0	0	5	5	2	3	2	3	1	3	3	3	3	3	1
2	2	4	8	5	4	1	0	0	0	0	0	0	0	0	0	0	0	0	0	5	5	4	5	4	5	5	5	4	4	3	3	1
2	1	4	5	5	4	1	0	1	0	0	0	0	0	0	0	1	0	0	0	4	4	4	4	2	4	4	4	4	4	4	3	1
2	2	1	7	3	4	1	1	1	0	1	1	1	1	1	0	1	0	0	0	5	5	3	4	1	2	3	5	4	2	3	4	1
2	3	4	7	3	4	1	0	1	0	0	1	0	1	1	1	0	0	0	0	5	5	4	5	3	4	4	4	4	5	3	5	1
1	3	3	8	3	4	0	0	1	0	0	0	0	0	0	0	1	1	0	0	2	2	1	2	1	2	2	2	2	2	2	1	1
1	2	3	6	4	4	1	1	1	0	0	0	0	0	0	0	0	0	0	0	3	3	3	3	3	3	4	3	2	3	3	2	1
2	1	4	5	3	4	1	1	1	0	0	0	0	0	0	0	1	0	0	0	4	4	4	4	4	4	3	3	4	3	3	4	1
2	2	4	9	3	4	1	0	0	0	0	0	0	0	0	0	0	0	0	0	3	3	3	4	4	4	3	4	4	3	4	4	1
2	2	1	7	2	4	1	0	1	0	0	0	0	0	0	0	0	0	0	0	3	2	3	5	3	3	5	5	5	5	5	2	1
2	1	1	7	3	4	1	0	0	0	0	0	0	0	0	0	0	0	0	0	4	4	2	4	3	4	5	5	3	1	2	3	1
2	1	4	7	5	4	1	0	0	0	0	1	0	0	0	0	0	0	0	0	2	4	3	4	1	3	2	4	3	1	2	1	1
1	2	4	7	5	2	1	0	0	0	0	1	0	1	0	0	0	0	1	0	5	5	3	5	1	2	1	5	3	2	3	2	1
2	1	4	5	5	4	1	0	0	0	0	0	0	0	0	0	0	0	0	0	5	5	3	5	3	5	5	5	3	5	5	3	1
2	1	1	7	4	4	0	0	0	0	0	1	0	0	0	0	1	0	0	0	2	3	2	3	2	2	4	3	2	2	3	2	1
1	1	4	7	3	4	1	0	1	0	0	0	0	0	0	0	0	0	0	0	5	4	3	5	3	4	3	4	3	3	2	4	1
2	1	4	7	5	5	1	0	0	0	0	1	0	0	0	0	0	0	0	0	4	3	3	4	3	4	4	4	4	3	3	3	1
2	2	1	7	3	4	1	0	1	0	0	0	0	0	0	0	0	0	0	0	3	1	3	4	1	3	4	5	1	1	3	1	1
1	1	1	5	4	4	1	1	1	0	0	1	1	0	0	1	0	0	0	0	3	3	2	4	4	5	3	4	4	3	2	3	1
1	1	2	4	1	4	0	1	0	0	0	0	0	0	0	0	0	0	0	0	5	1	4	3	3	5	4	4	1	2	5	1	1
2	2	2	3	3	4	0	0	0	1	0	0	1	0	0	0	0	0	0	0	2	3	2	3	3	1	2	3	1	3	3	3	1
1	2	3	2	3	4	0	1	0	0	0	0	0	1	0	0	0	0	0	0	3	2	4	1	4	4	5	4	4	3	5	5	1
2	1	4	5	4	4	1	1	1	1	0	0	0	0	0	0	0	0	0	0	3	2	3	3	3	3	3	3	4	4	4	2	1
2	1	4	5	4	4	1	1	1	1	0	0	0	0	0	0	0	0	0	0	3	4	4	4	4	3	3	4	4	3	2	4	1
1	1	1	5	5	4	1	1	1	0	0	0	0	1	0	0	0	0	0	0	4	4	4	4	4	4	3	4	4	1	2	4	1
2	1	1	5	5	4	1	0	1	0	0	1	1	0	0	0	0	0	0	0	4	3	3	4	4	3	3	4	2	4	1	4	1
1	1	4	5	4	4	1	1	1	0	1	0	0	1	0	0	0	0	0	0	3	3	4	3	4	4	4	3	3	4	1	2	1
1	1	1	7	2	2	1	0	0	0	0	0	0	0	0	0	0	0	0	0	2	3	2	2	2	2	2	2	2	3	3	1	1
1	1	4	5	3	4	1	0	0	0	0	0	1	0	0	0	0	0	0	1	2	3	4	3	2	4	3	2	3	2	3	5	1
1	1	4	5	3	4	1	0	1	0	0	0	0	0	0	0	1	0	0	0	5	5	2	3	2	3	3	3	3	1	3	2	1
2	1	4	5	5	4	1	0	0	0	0	0	0	0	0	0	1	0	1	0	3	4	4	4	1	5	4	5	3	3	2	4	1
2	1	4	5	5	4	0	1	0	0	0	1	0	0	0	0	0	0	0	0	2	3	4	3	4	3	3	2	3	4	4	4	1
2	1	4	7	5	2	1	0	0	0	0	0	0	0	0	0	0	0	0	0	5	5	3	4	1	4	5	4	4	4	3	2	1
2	1	1	5	5	4	1	1	1	0	0	0	0	0	0	0	1	0	0	0	4	3	1	4	3	3	5	5	3	4	2	2	1
1	1	4	7	3	4	0	1	0	0	0	1	1	1	0	0	0	0	0	0	2	2	1	3	1	2	3	4	5	1	3	5	1
1	3	2	8	4	4	0	0	0	0	0	0	0	0	0	0	0	1	0	0	4	4	4	3	3	4	4	4	5	4	4	5	1

## Sheet: variable parameter
Q1 sex	1=male	2=female
Q2 age	1=18-30 years old	2=31-45 years old	3=46-60 years old	4=61-75 years old	5=above 75 years old
Q3 Education level	1=below junior high school	2=junior high school	3=senior high school	4=university degree	5=master’s degree or above
Q4 Occupation	1=housewife	2=teacher	3=farmer	4=civil servant	5=company employee
Q5 Househould number	1=1	2=2	3=3	4=4	5=5 or above
Q6 City	1=Beijing	2=Shanghai	3=Guangdong	4=Hunan	5=Hebei
Q71 Cold medication	0=No storage	1=Storage
Q72 Pain medication	0=No storage	1=Storage
Q73 Antibiotics	0=No storage	1=Storage
Q74 Sleep aids	0=No storage	1=Storage
Q75 Antiallergic	0=No storage	1=Storage
Q76 Gastrointestinal medicines	0=No storage	1=Storage
Q77 Digestive medicine	0=No storage	1=Storage
Q78 External painkillers	0=No storage	1=Storage
Q79 External anti-inflammatory	0=No storage	1=Storage
Q710 Medicine for the treatment of gynecological conditions	0=No storage	1=Storage
Q711 Vitamin	0=No storage	1=Storage
Q712 Medicines for hypertension and coronary heart disease	0=No storage	1=Storage
Q713 Quick-acting heart-saving pills, such as nitroglycerin	0=No storage	1=Storage
Q714 Others	0=No storage	1=Storage
Q8 Expiration date of medications	1=No attention	2=Somewhat attention	3=Attention	4=More attention	5=Most attention
Q9 Manufacture date	1=No attention	2=Somewhat attention	3=Attention	4=More attention	5=Most attention
Q10 Storage temperature	1=No attention	2=Somewhat attention	3=Attention	4=More attention	5=Most attention
Q11 Cold storage	1=No attention	2=Somewhat attention	3=Attention	4=More attention	5=Most attention
Q12 Storage humidity	1=No attention	2=Somewhat attention	3=Attention	4=More attention	5=Most attention
Q13 Preservation of medicine drying	1=No attention	2=Somewhat attention	3=Attention	4=More attention	5=Most attention
Q14 Keeping medicines away from the children	1=No attention	2=Somewhat attention	3=Attention	4=More attention	5=Most attention
Q15 Keeping out of kitchen and bathroom	1=No attention	2=Somewhat attention	3=Attention	4=More attention	5=Most attention
Q16 Placement of first aid medicines	1=No attention	2=Somewhat attention	3=Attention	4=More attention	5=Most attention
Q17 Medicine mixing	1=No attention	2=Somewhat attention	3=Attention	4=More attention	5=Most attention
Q18 Eliminating medicines which had expired	1=No attention	2=Somewhat attention	3=Attention	4=More attention	5=Most attention
Q19 Special recycling mechanisms	1=No attention	2=Somewhat attention	3=Attention	4=More attention	5=Most attention
Q20 Main source of medicines	1=Got from drugstores	2=Obtained from hospitals	3=Obtained from hospitals
